# Supplementary material for: Extracellular vesicles from type-2 macrophages increase the survival of chronic lymphocytic leukemia cells ex vivo
Source: PubMed Central journal article supplement (PMC11327105; doi:10.1038/s41417-024-00802-7), 2024-06-25

Flow cytometry – Healthy donors  
monocytes/macrophages

# HEALTHY DONOR MONOCYTES - 1

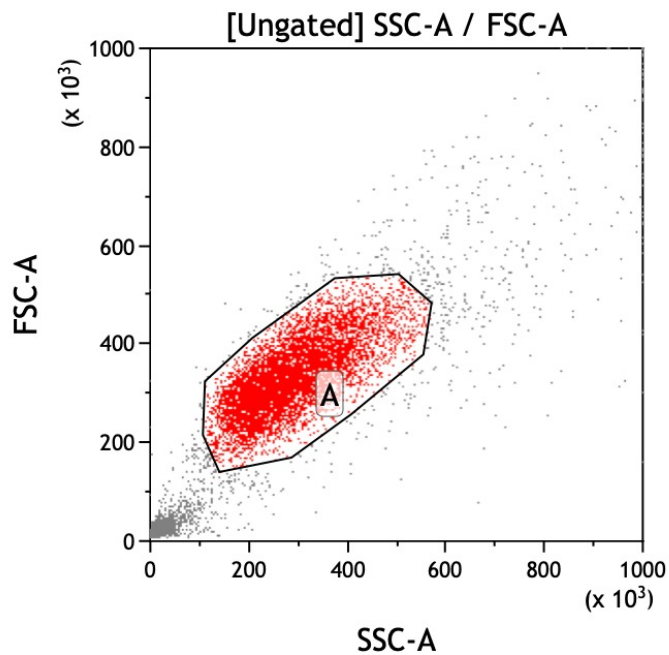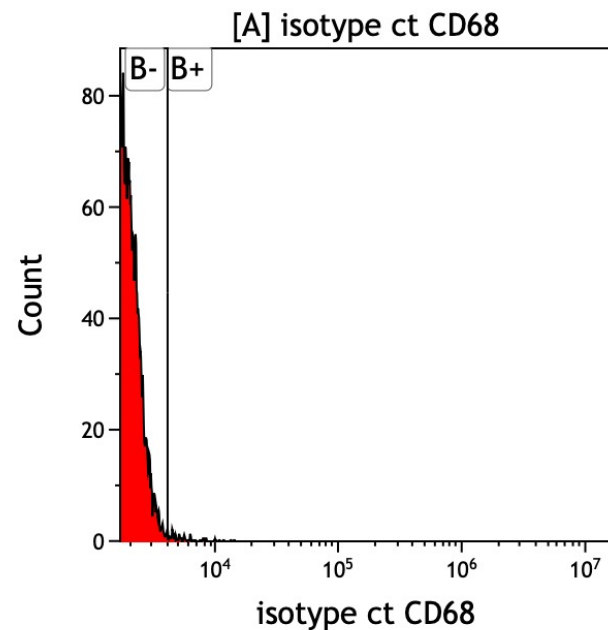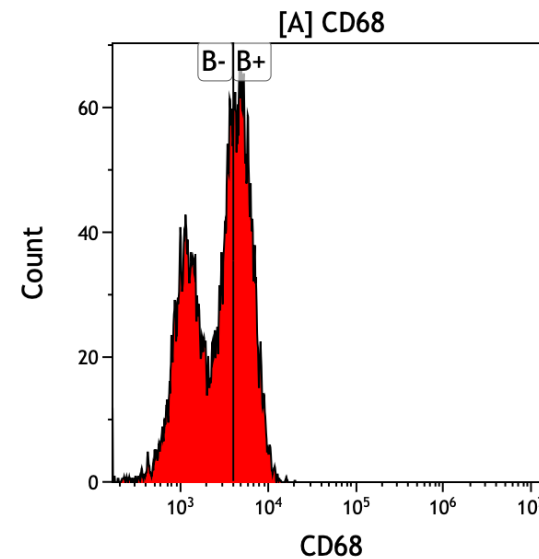

Gate %Gated

|     |        |
|-----|--------|
| All | 100,00 |
| B-  | 60,70  |
| B+  | 39,30  |

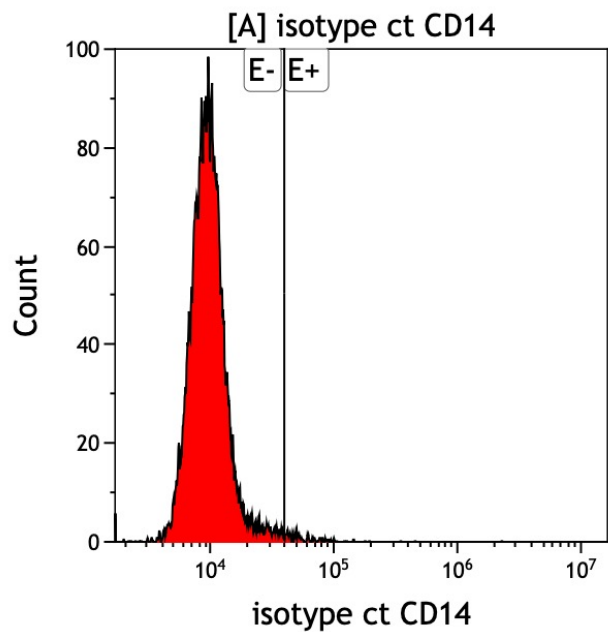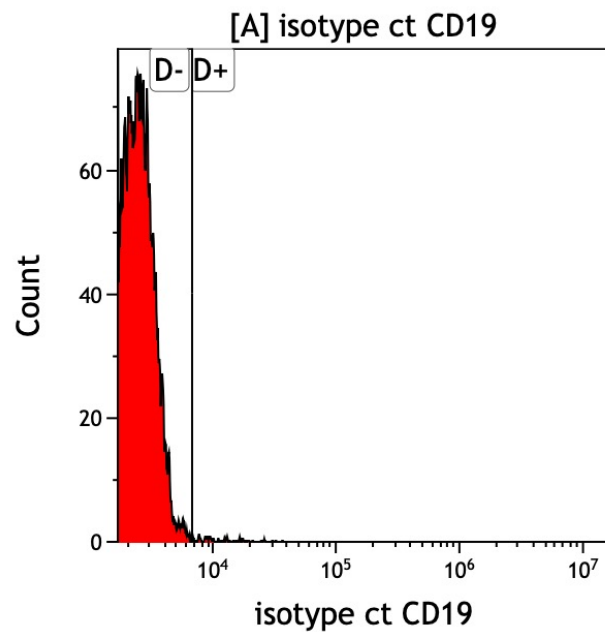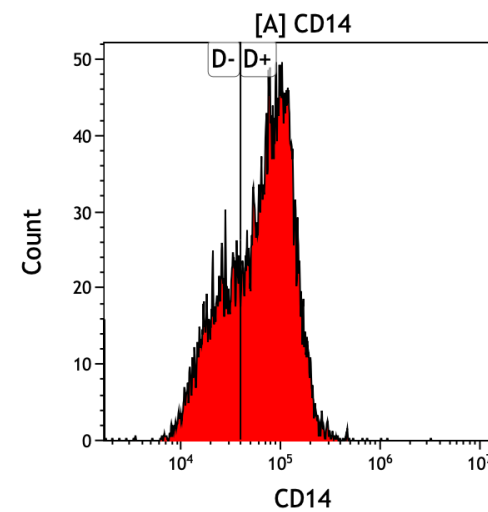

Gate %Gated

|     |        |
|-----|--------|
| All | 100,00 |
| D-  | 29,56  |
| D+  | 70,44  |

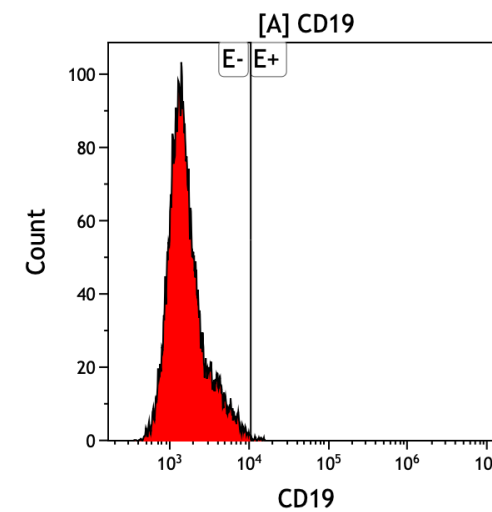

Gate %Gated

|     |        |
|-----|--------|
| All | 100,00 |
| E-  | 99,76  |
| E+  | 0,24   |

# HEALTHY DONOR MONOCYTES - 2

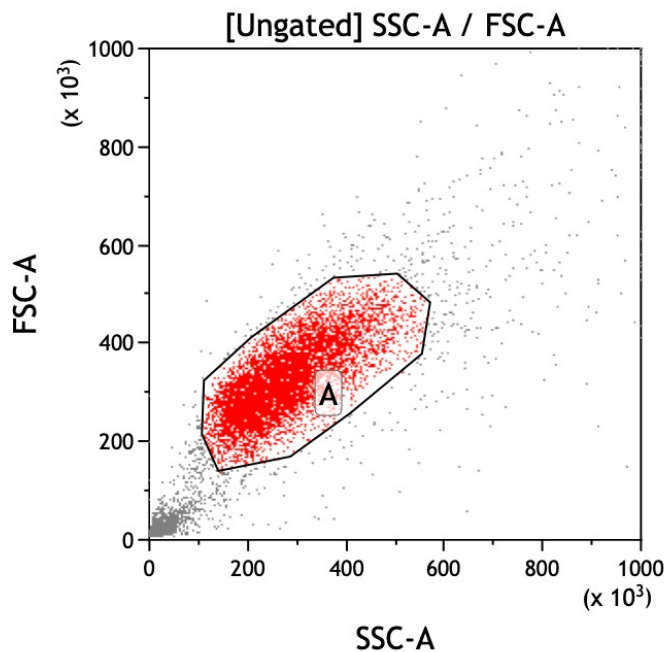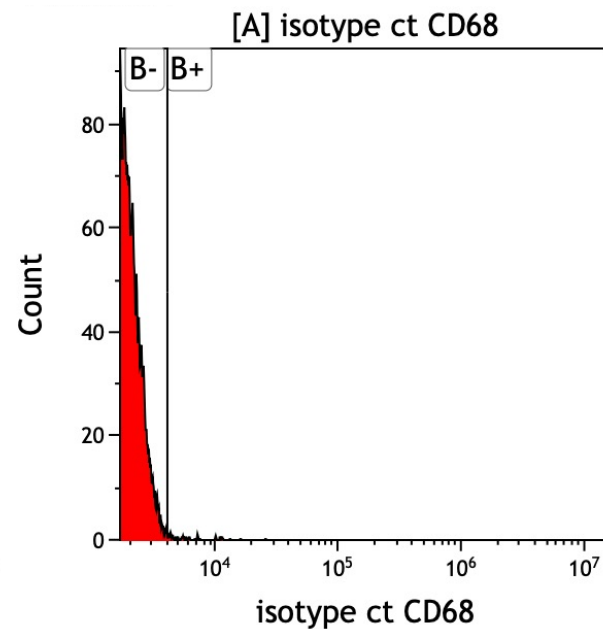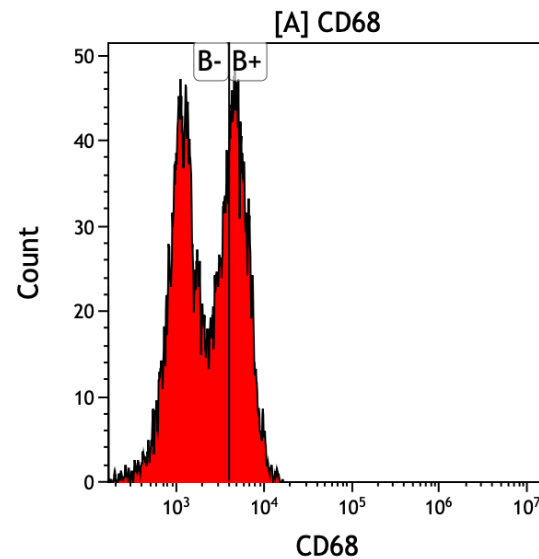

Gate %Gated

|     |        |
|-----|--------|
| All | 100,00 |
| B-  | 66,71  |
| B+  | 33,29  |

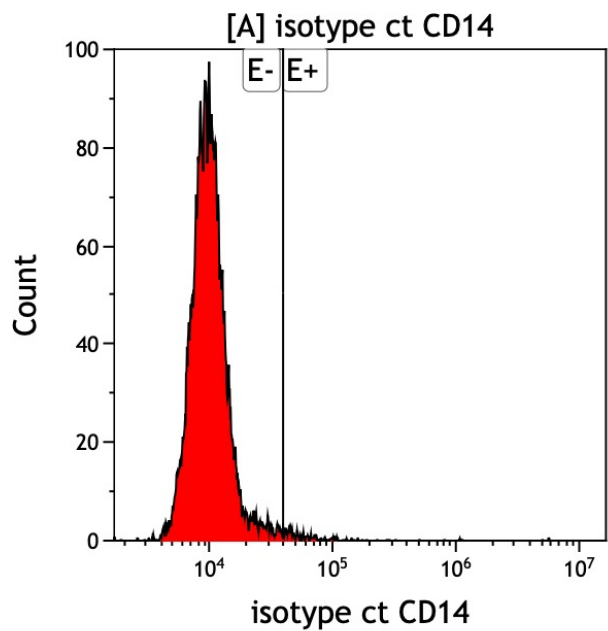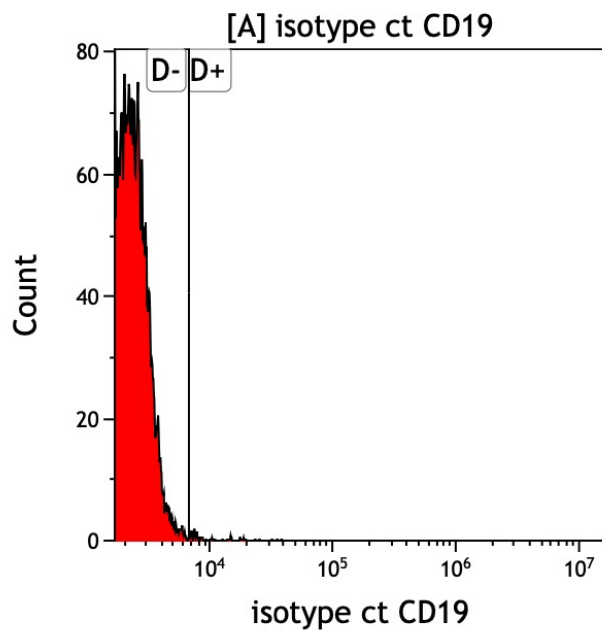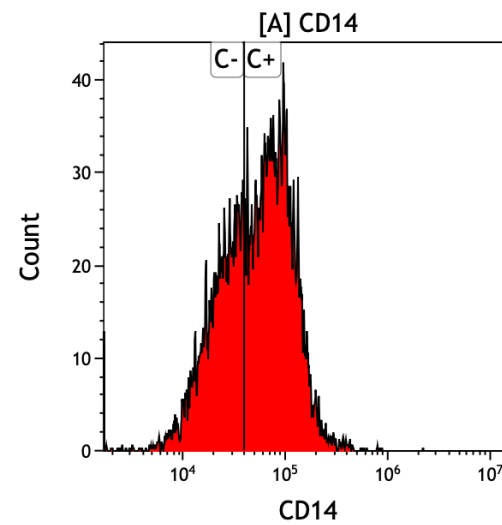

Gate %Gated

|     |        |
|-----|--------|
| All | 100,00 |
| C-  | 37,56  |
| C+  | 62,44  |

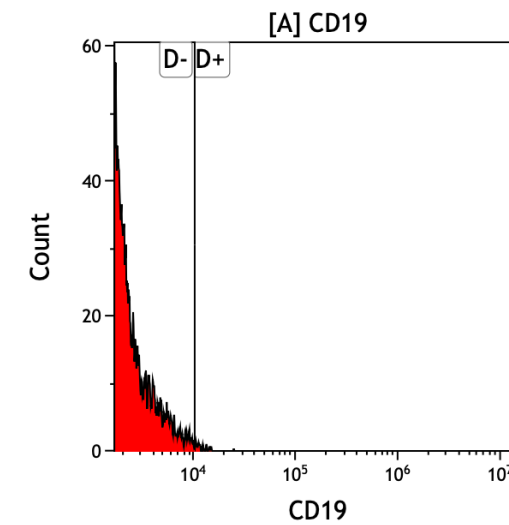

Gate %Gated

|     |        |
|-----|--------|
| All | 100,00 |
| D-  | 99,61  |
| D+  | 0,39   |

# HEALTHY DONOR MONOCYTES - 3

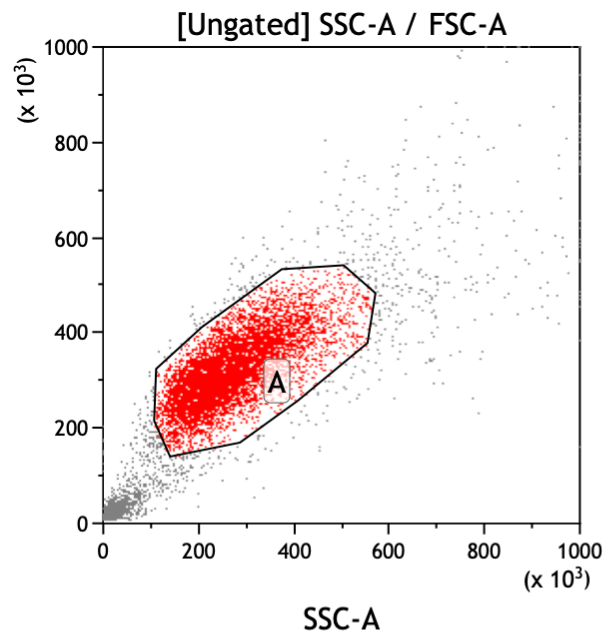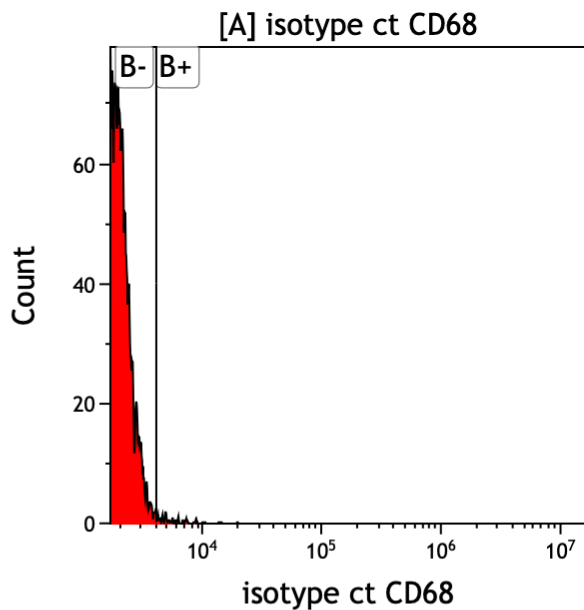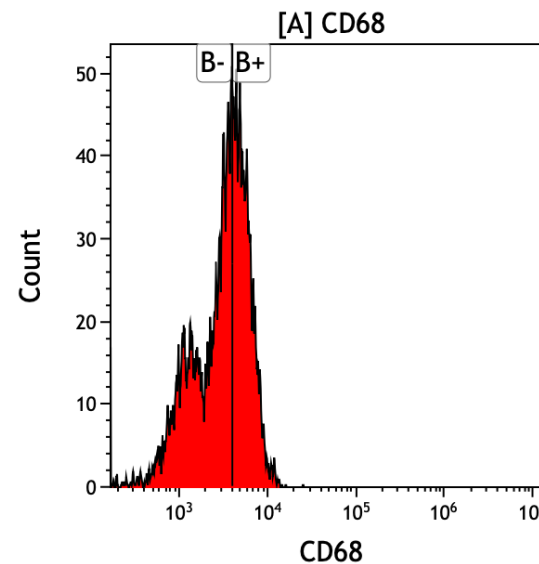

| Gate | %Gated |
|------|--------|
| All  | 100,00 |
| B-   | 59,96  |
| B+   | 40,04  |

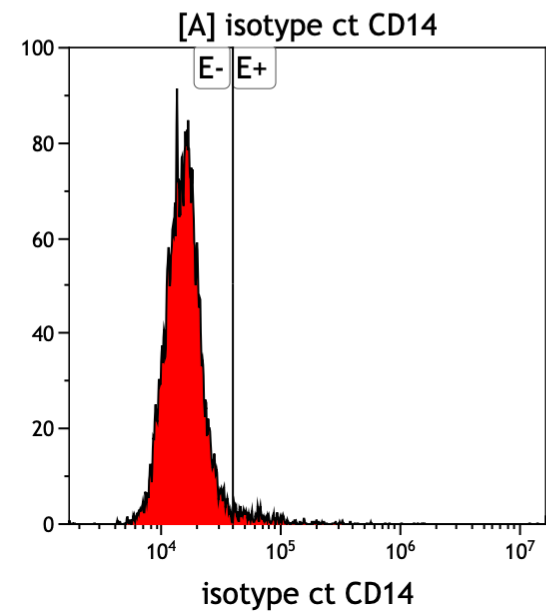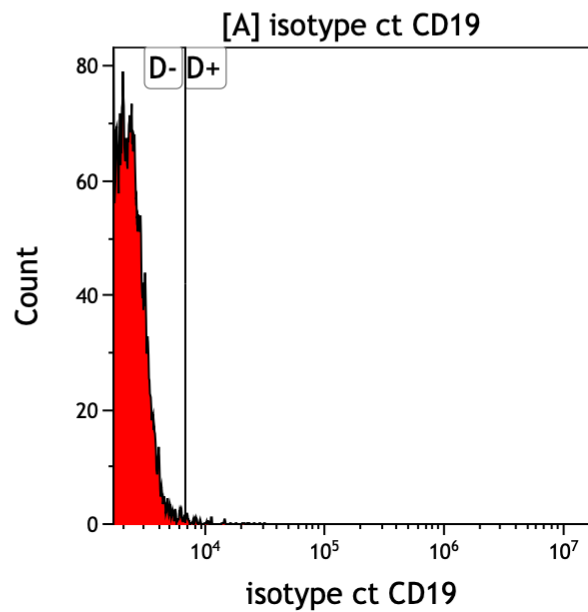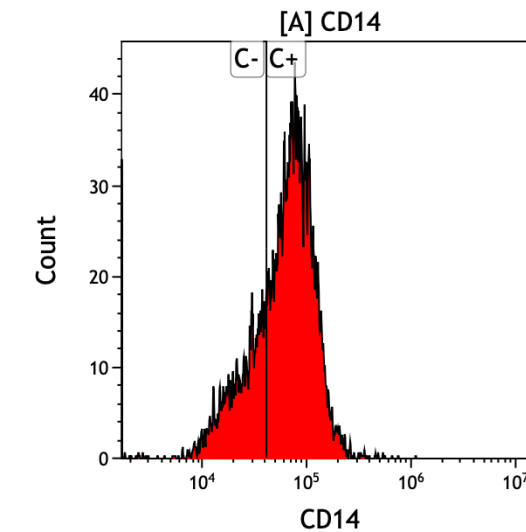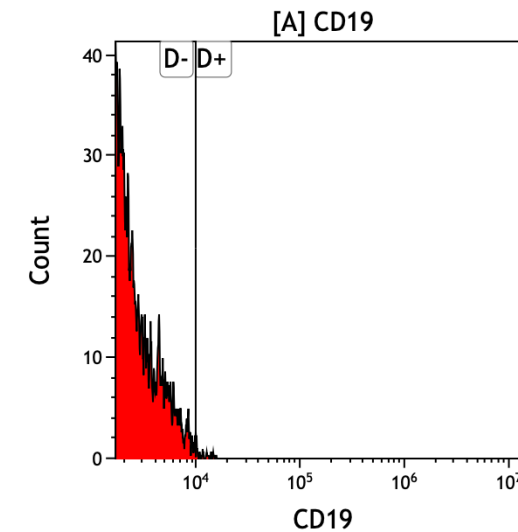

| Gate | %Gated |
|------|--------|
| All  | 100,00 |
| C-   | 26,62  |
| C+   | 73,38  |

| Gate | %Gated |
|------|--------|
| All  | 100,00 |
| D-   | 99,60  |
| D+   | 0,40   |

# HEALTHY DONOR MONOCYTES - 4

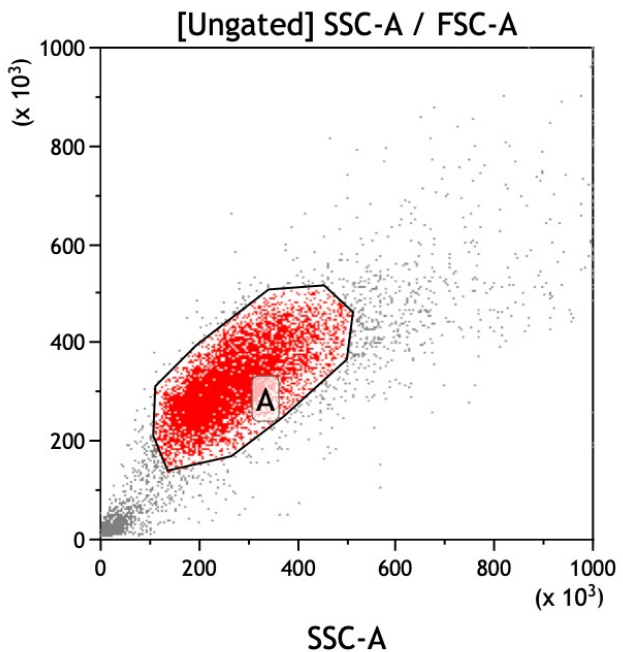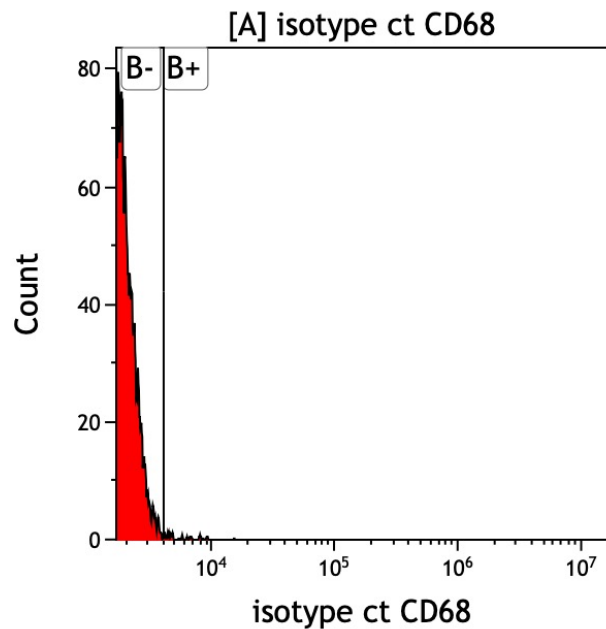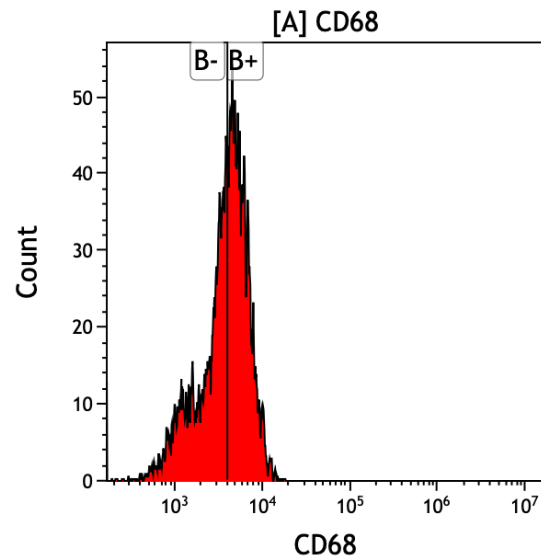

Gate %Gated

|     |        |
|-----|--------|
| All | 100,00 |
| B-  | 46,65  |
| B+  | 53,35  |

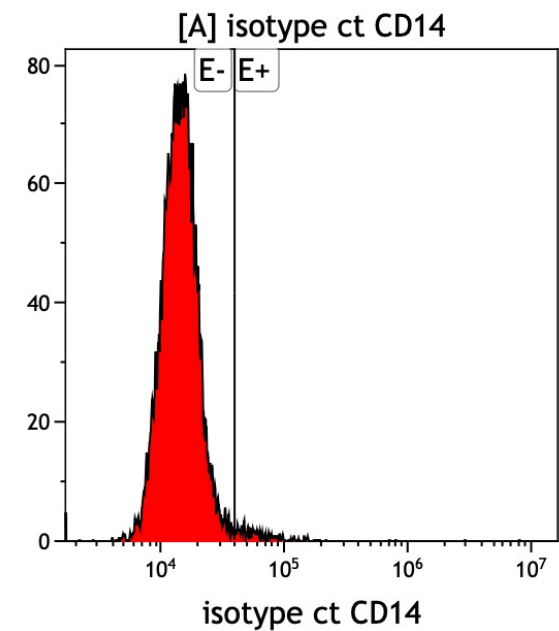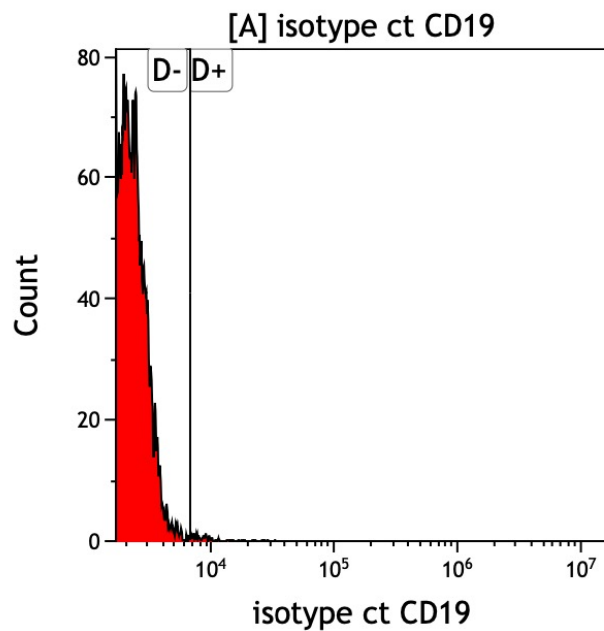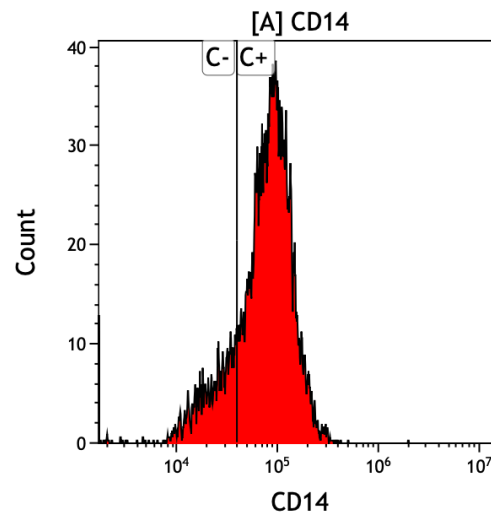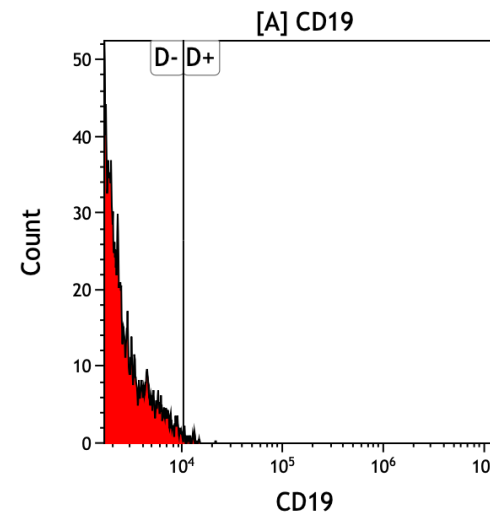

Gate %Gated

|     |        |
|-----|--------|
| All | 100,00 |
| C-  | 17,72  |
| C+  | 82,28  |

Gate %Gated

|     |        |
|-----|--------|
| All | 100,00 |
| D-  | 99,38  |
| D+  | 0,62   |

**HEALTHY DONOR  
MONOCYTES - 5**

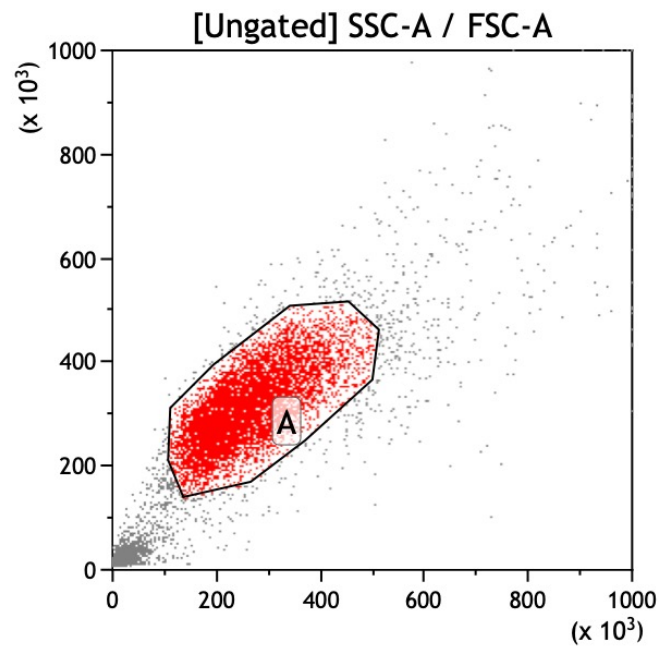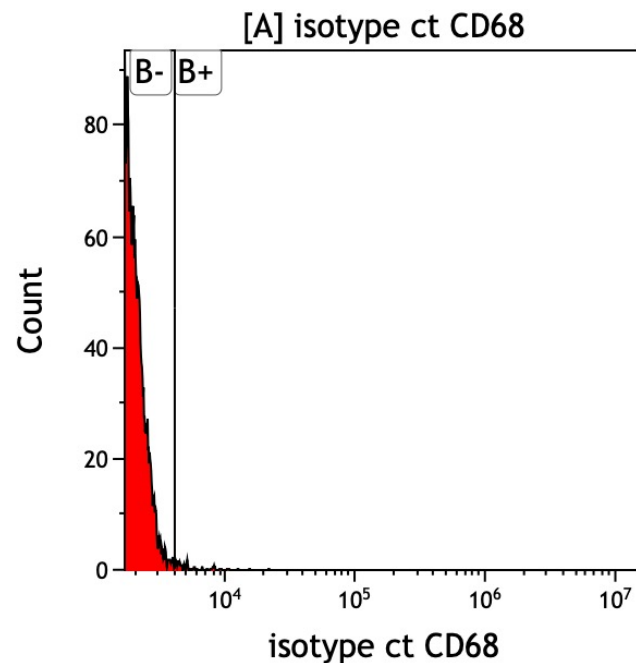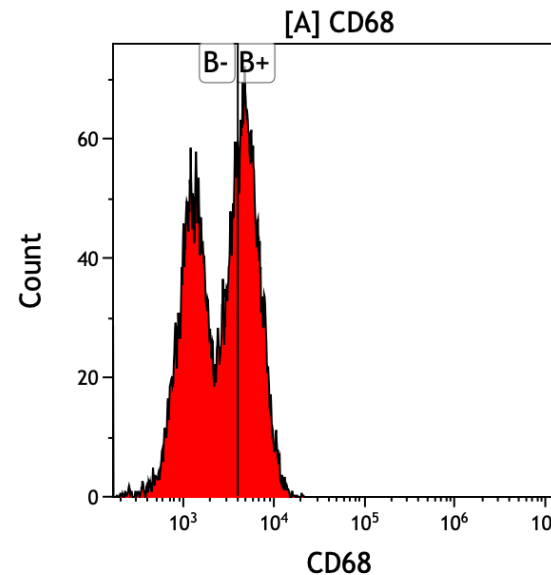

| Gate | %Gated |
|------|--------|
| All  | 100,00 |
| B-   | 61,01  |
| B+   | 38,99  |

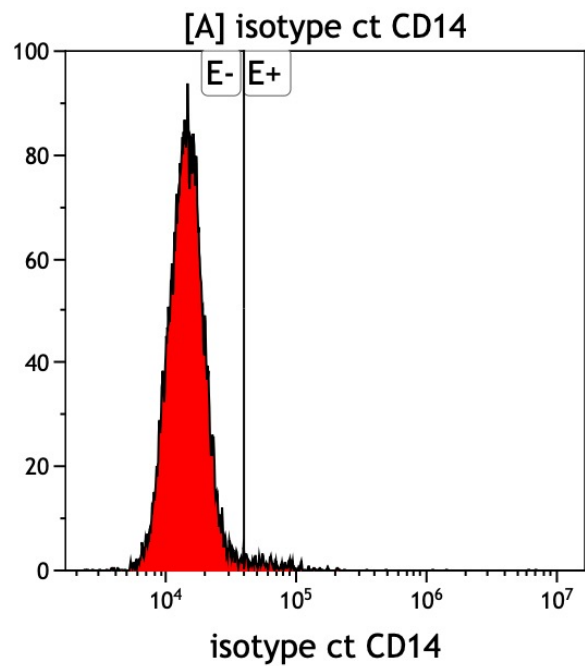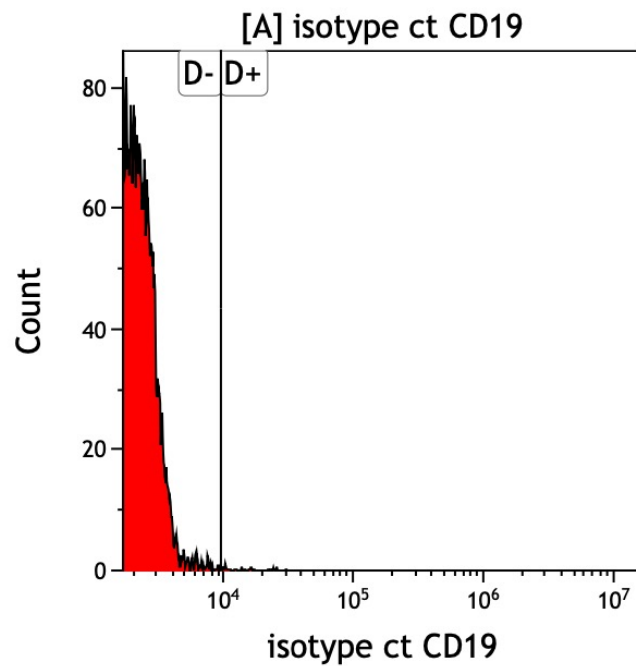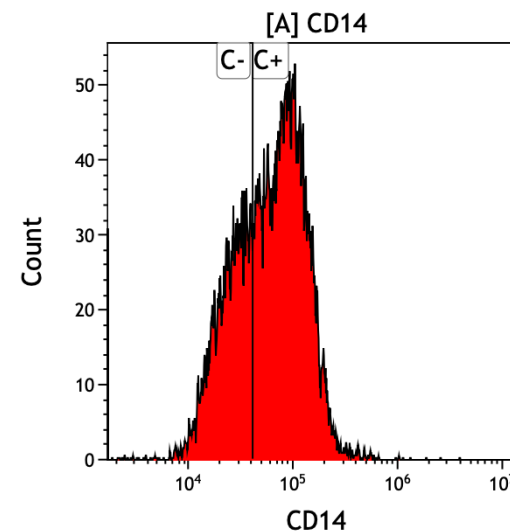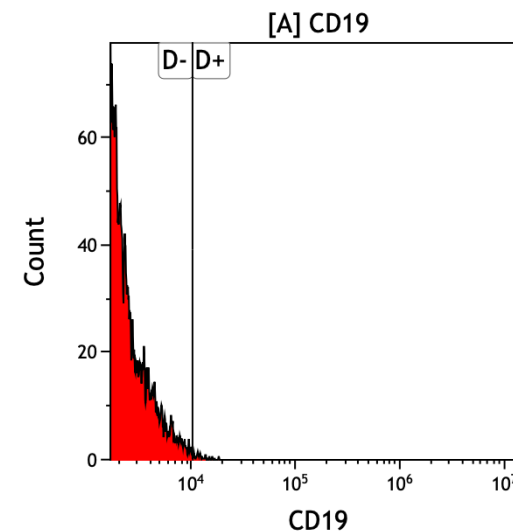

| Gate | %Gated |
|------|--------|
| All  | 100,00 |
| C-   | 33,16  |
| C+   | 66,84  |

| Gate | %Gated |
|------|--------|
| All  | 100,00 |
| D-   | 99,66  |
| D+   | 0,34   |

**HEALTHY DONOR  
MONOCYTES - 6**

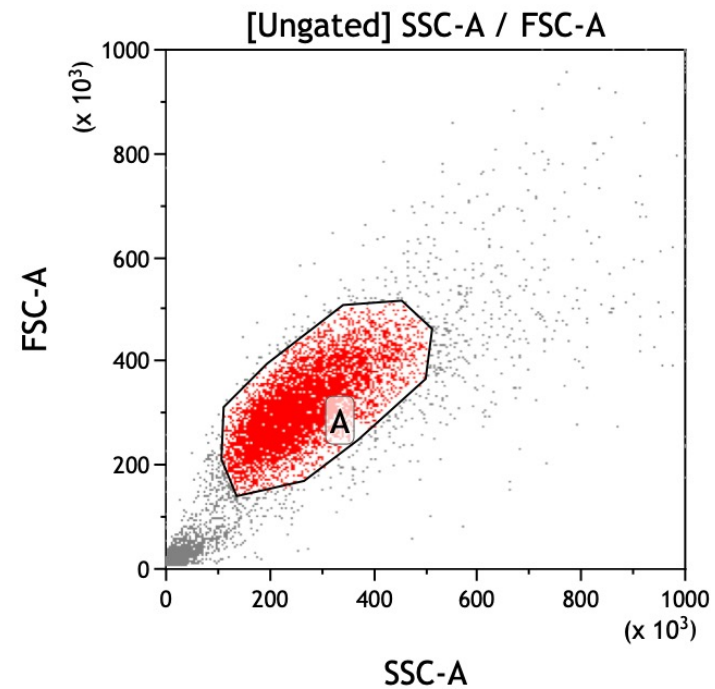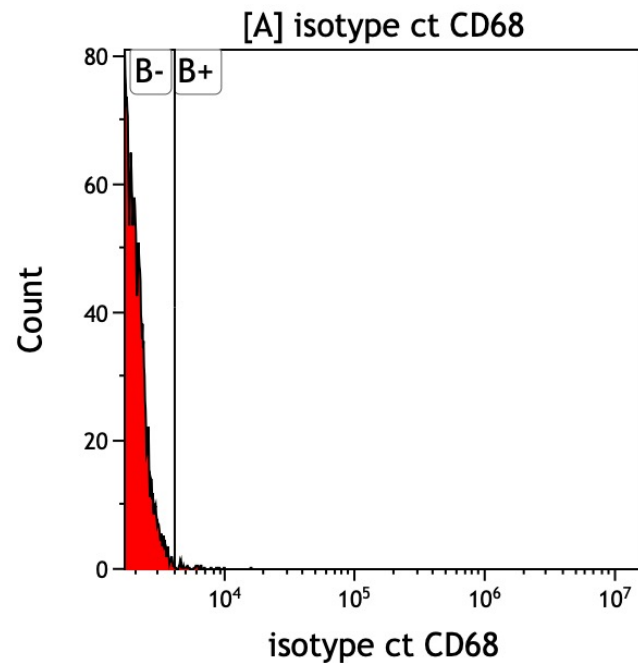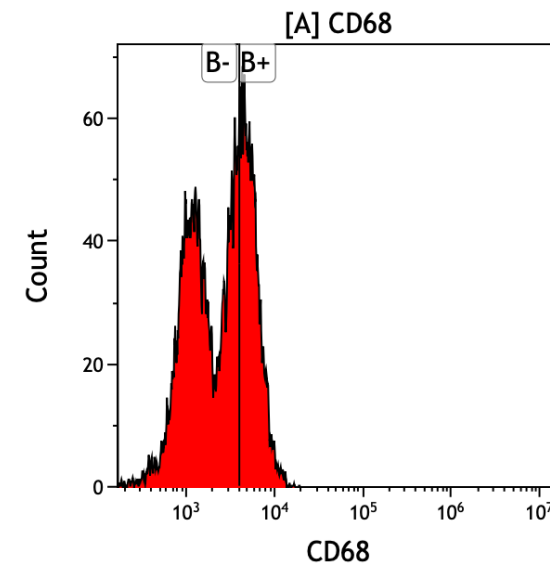

| Gate | %Gated |
|------|--------|
| All  | 100,00 |
| B-   | 65,19  |
| B+   | 34,81  |

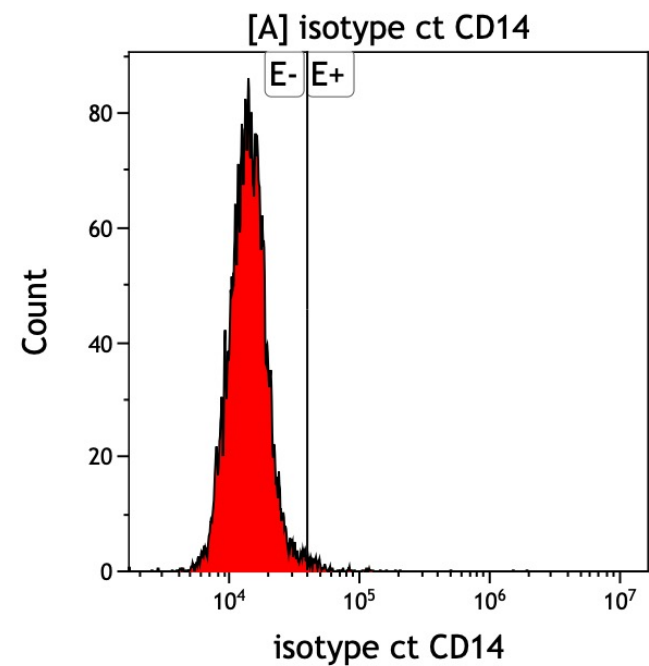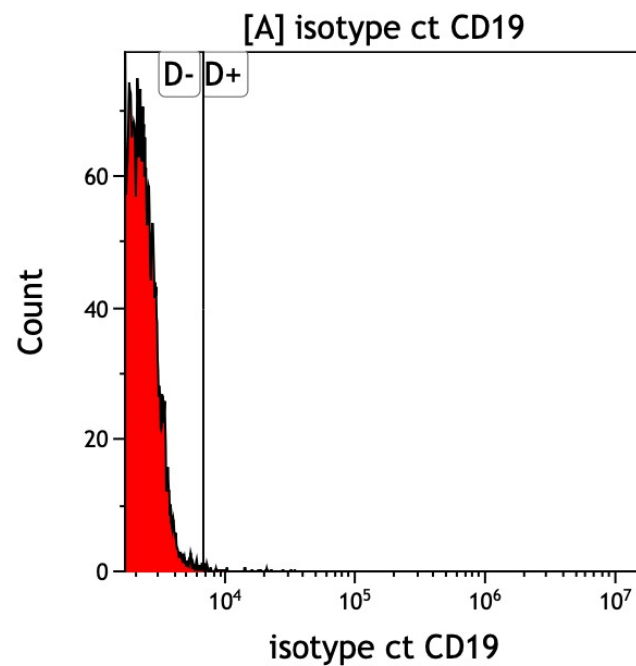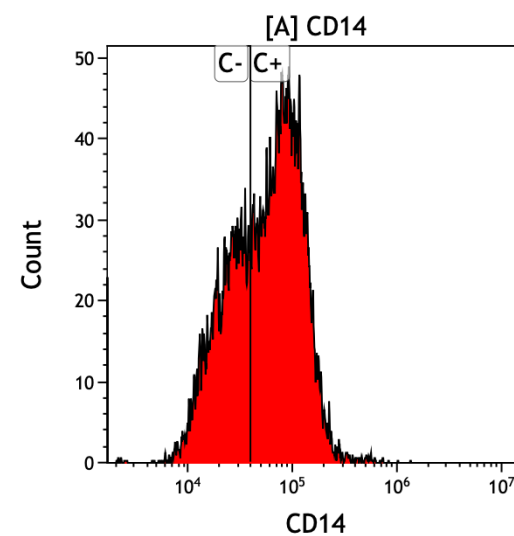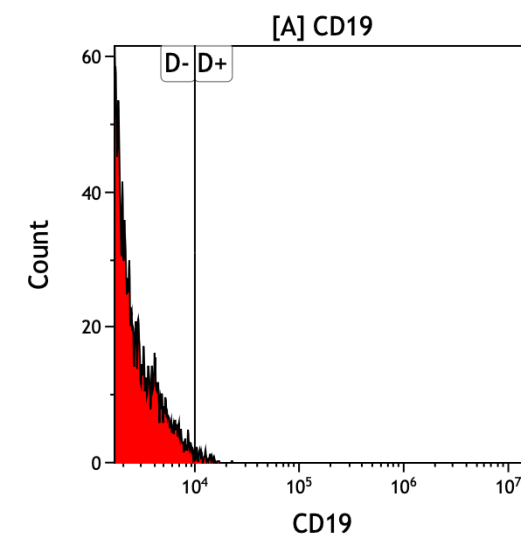

| Gate | %Gated |
|------|--------|
| All  | 100,00 |
| C-   | 34,56  |
| C+   | 65,44  |

| Gate | %Gated |
|------|--------|
| All  | 100,00 |
| D-   | 99,43  |
| D+   | 0,57   |

# HEALTHY DONOR MONOCYTES - 7

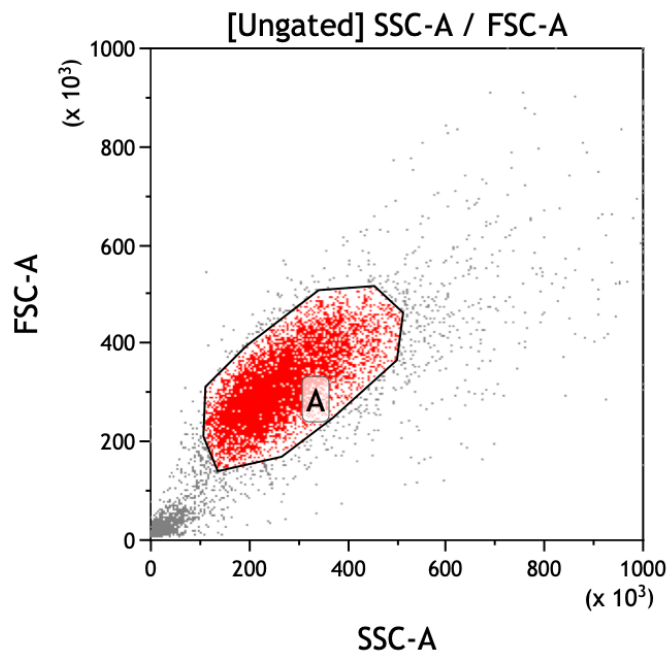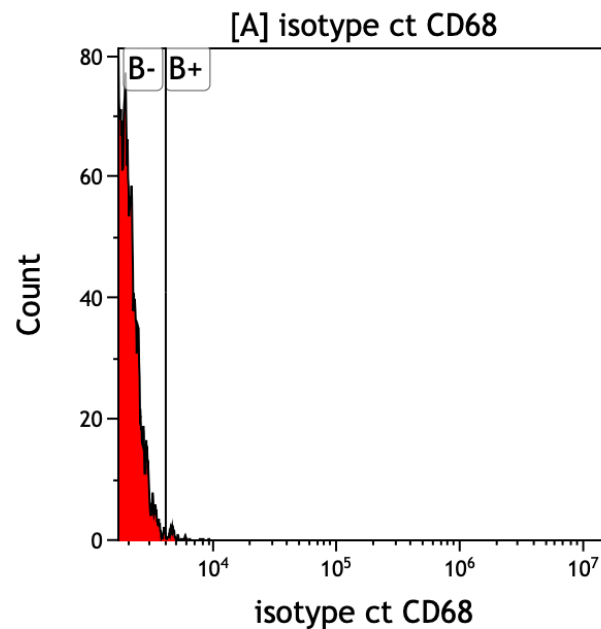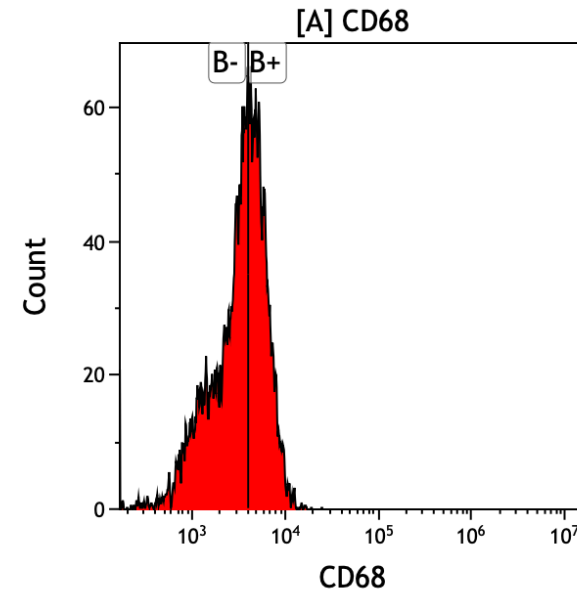

| Gate | %Gated |
|------|--------|
| All  | 100,00 |
| B-   | 56,17  |
| B+   | 43,83  |

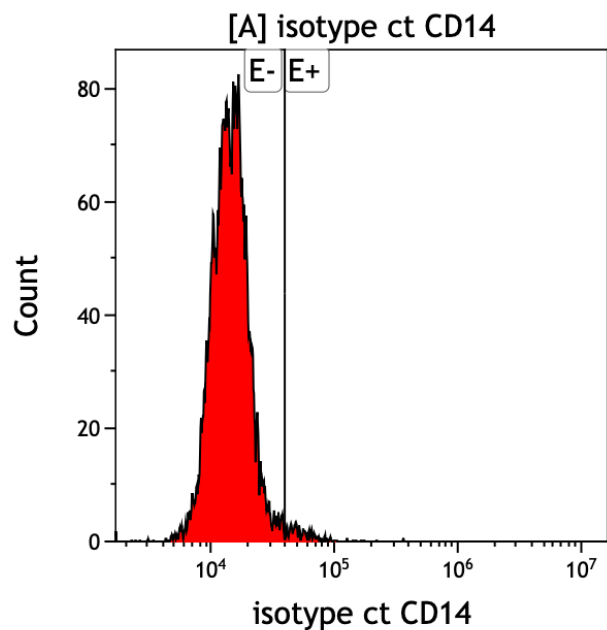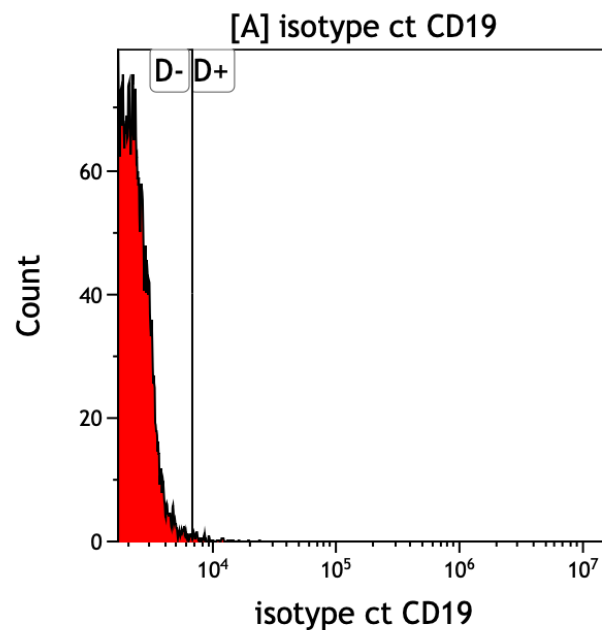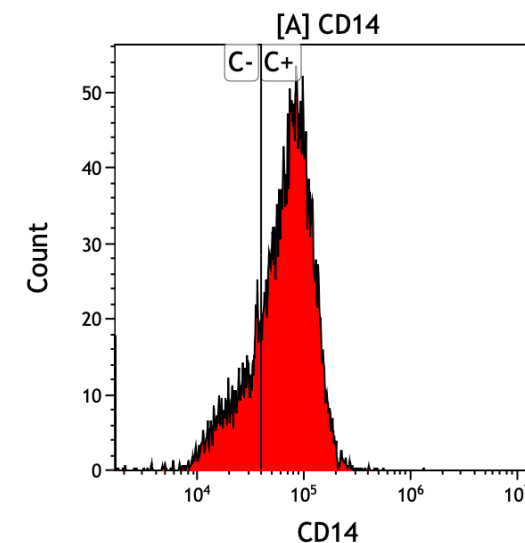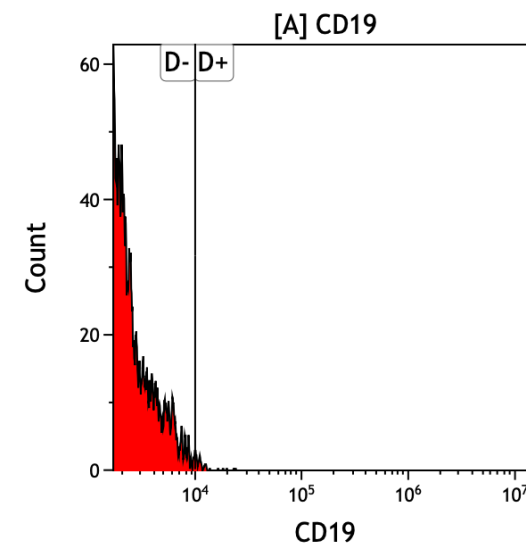

| Gate | %Gated |
|------|--------|
| All  | 100,00 |
| C-   | 21,71  |
| C+   | 78,29  |

| Gate | %Gated |
|------|--------|
| All  | 100,00 |
| D-   | 99,38  |
| D+   | 0,62   |



**HEALTHY DONOR  
MONOCYTES - 8**

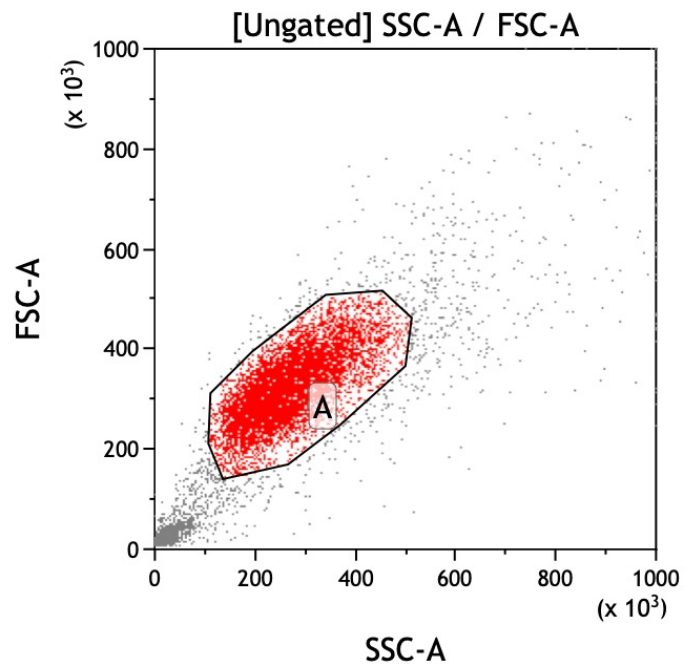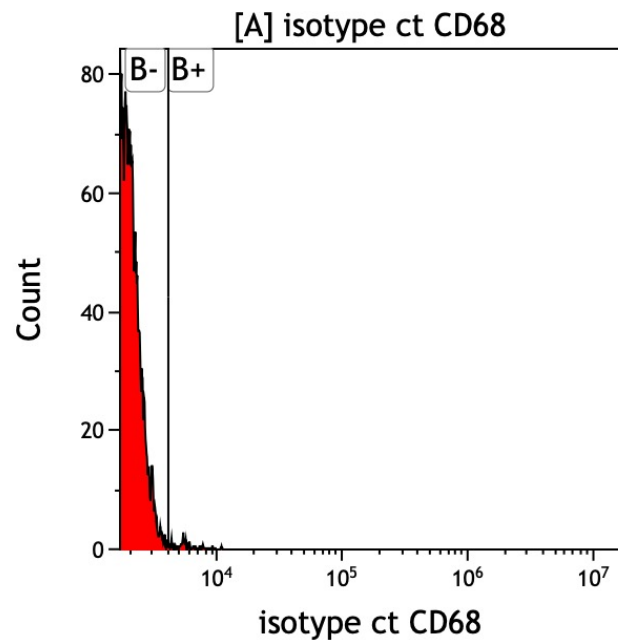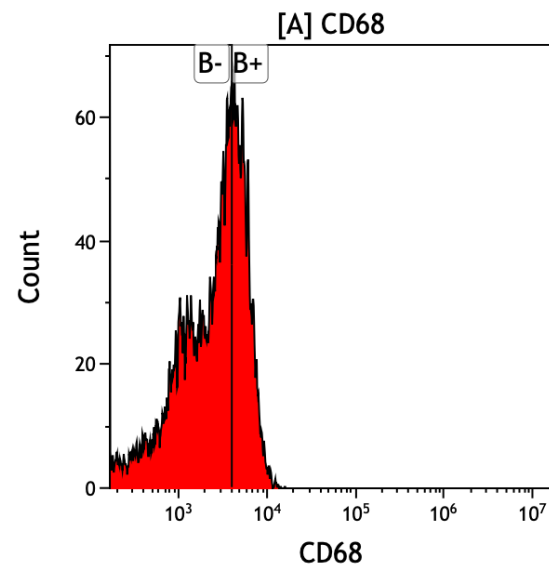

| Gate | %Gated |
|------|--------|
| All  | 100,00 |
| B-   | 67,63  |
| B+   | 32,37  |

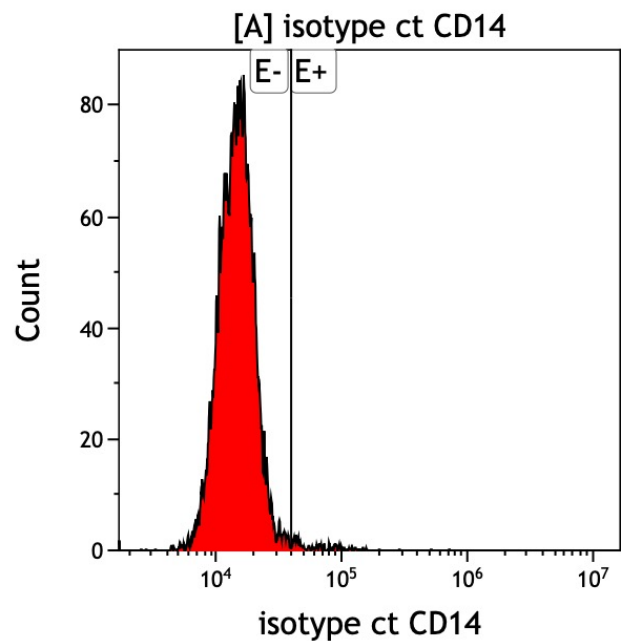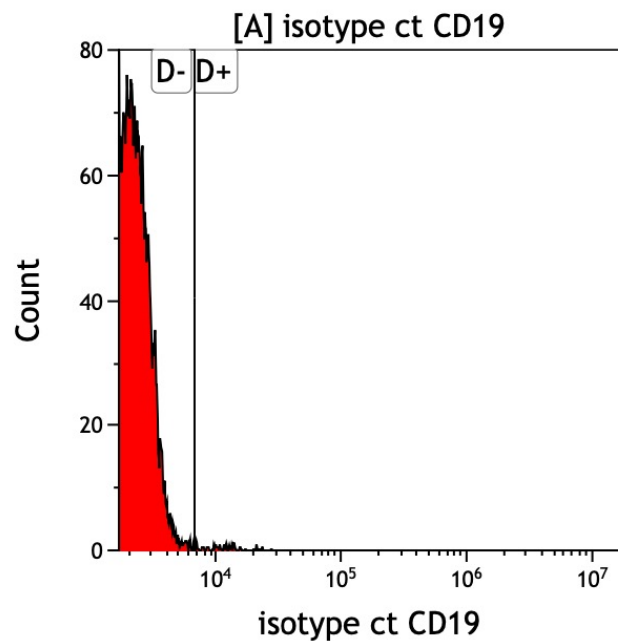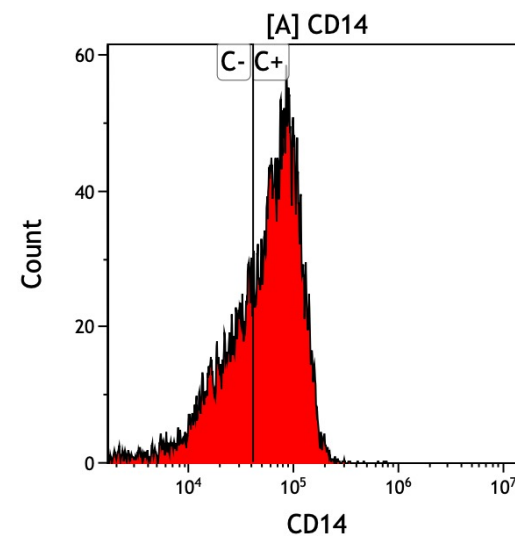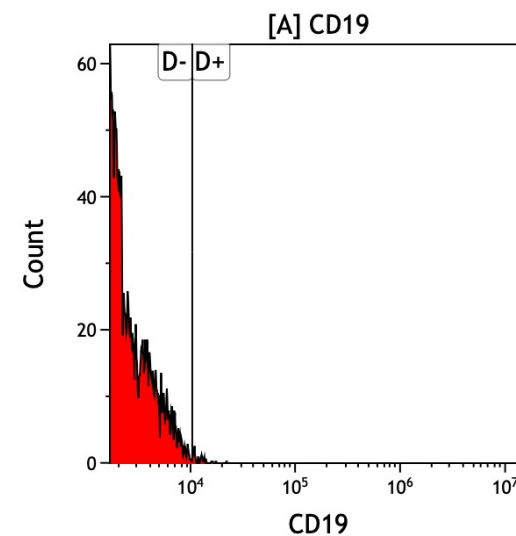

| Gate | %Gated |
|------|--------|
| All  | 100,00 |
| C-   | 39,31  |
| C+   | 60,69  |

| Gate | %Gated |
|------|--------|
| All  | 100,00 |
| D-   | 99,62  |
| D+   | 0,38   |

# HEALTHY DONOR MONOCYTES - 9

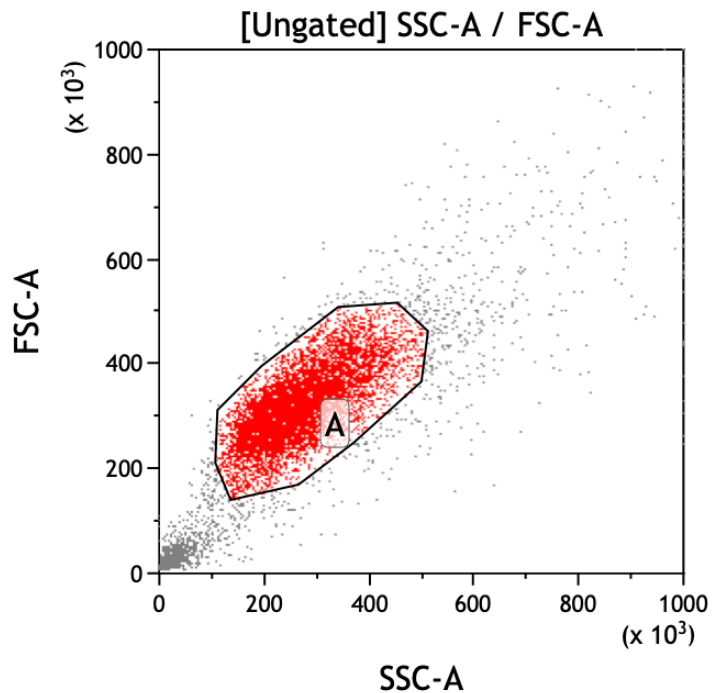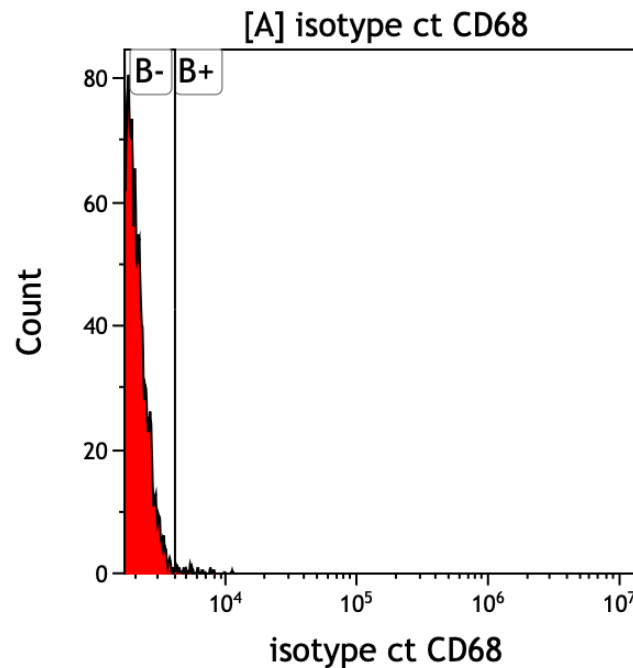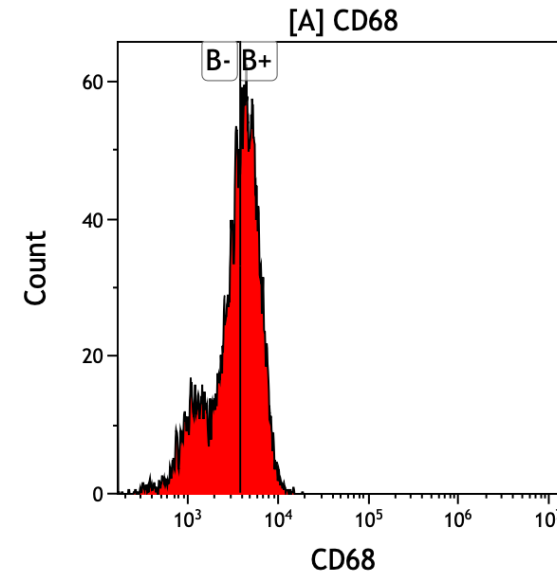

Gate %Gated

|     |        |
|-----|--------|
| All | 100,00 |
| B-  | 49,23  |
| B+  | 50,77  |

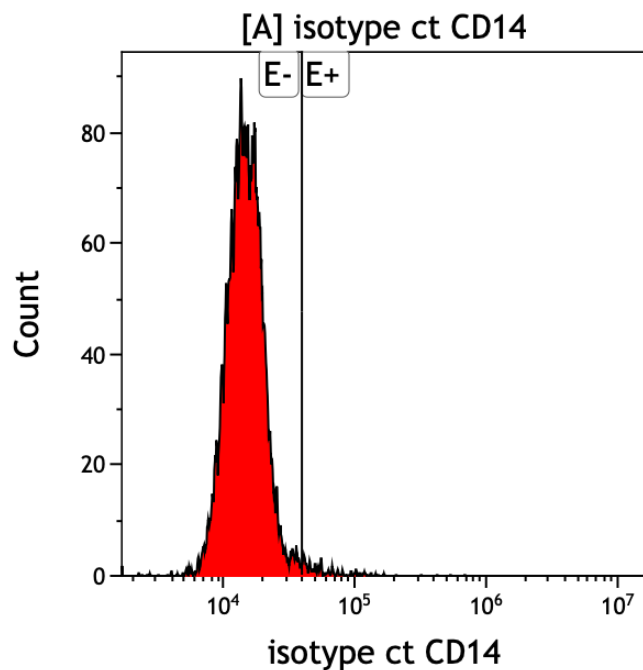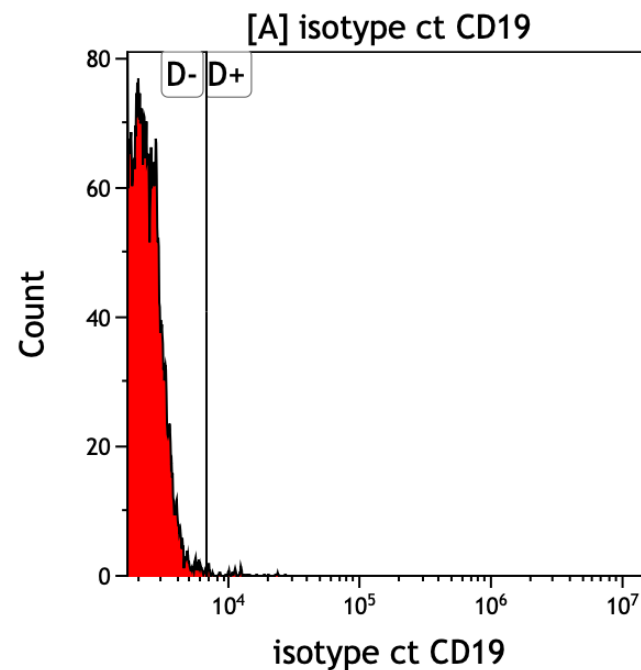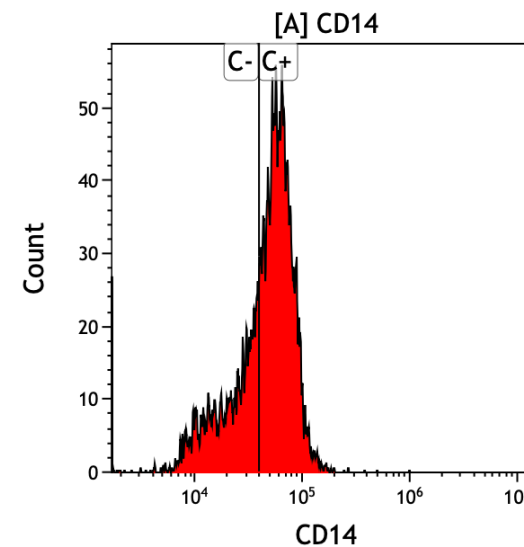

Gate %Gated

|     |        |
|-----|--------|
| All | 100,00 |
| C-  | 32,86  |
| C+  | 67,14  |

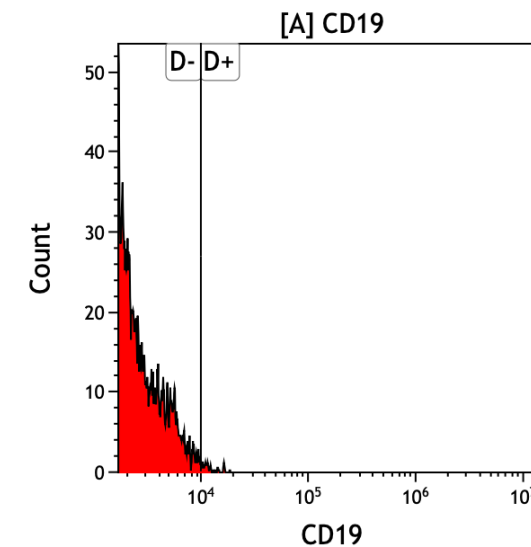

Gate %Gated

|     |        |
|-----|--------|
| All | 100,00 |
| D-  | 99,44  |
| D+  | 0,56   |

**HEALTHY DONOR  
MONOCYTES - 10**

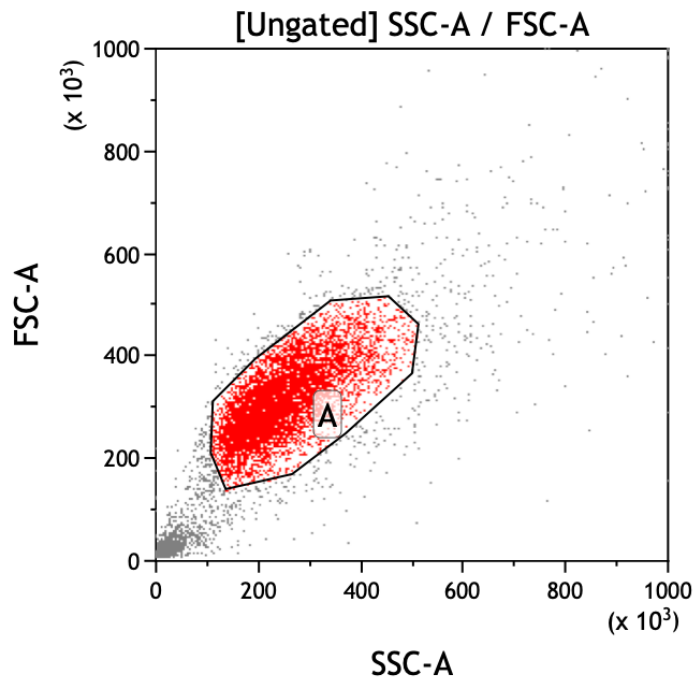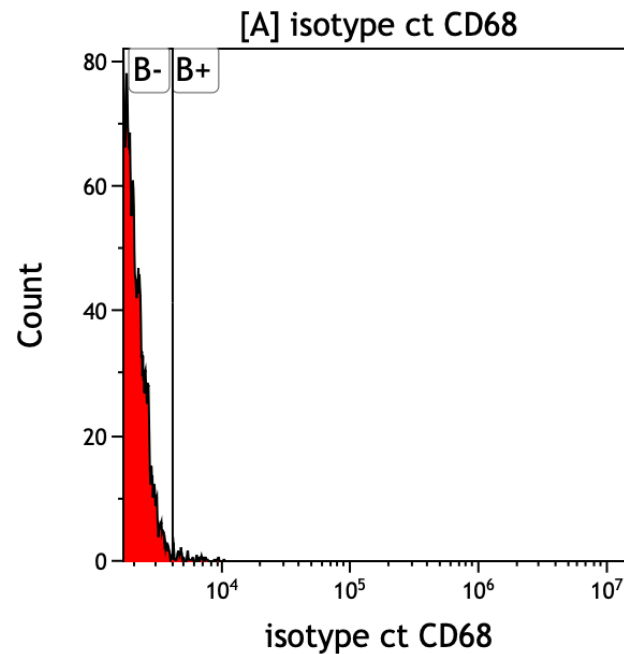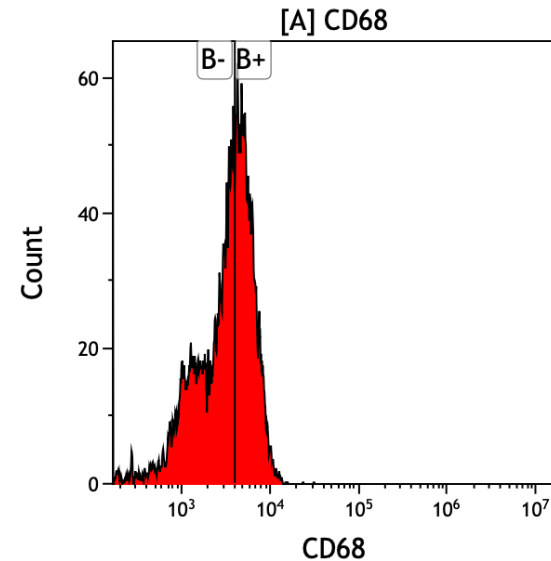

| Gate | %Gated |
|------|--------|
| All  | 100,00 |
| B-   | 56,18  |
| B+   | 43,82  |

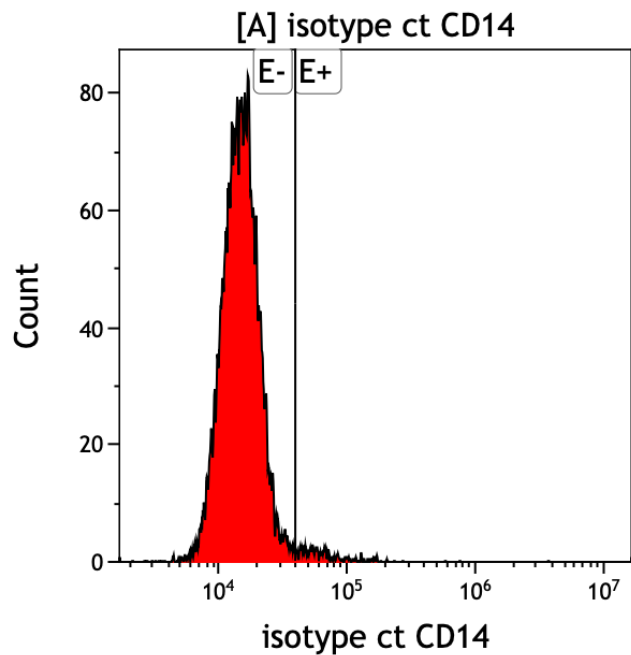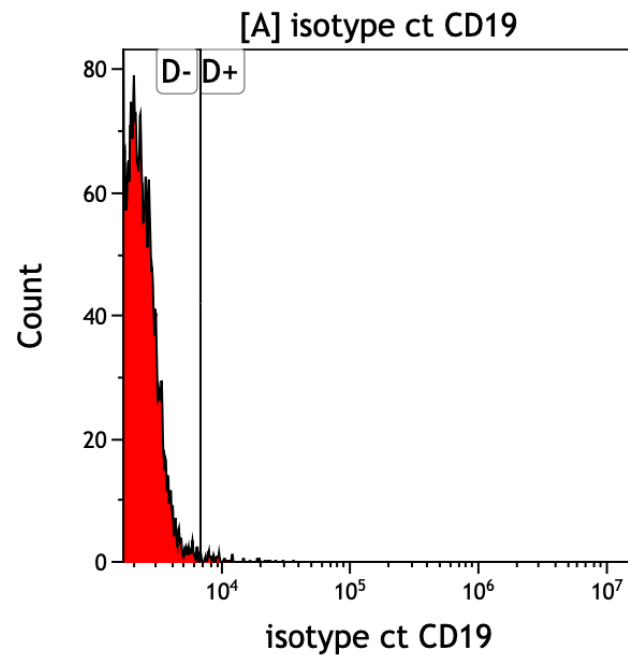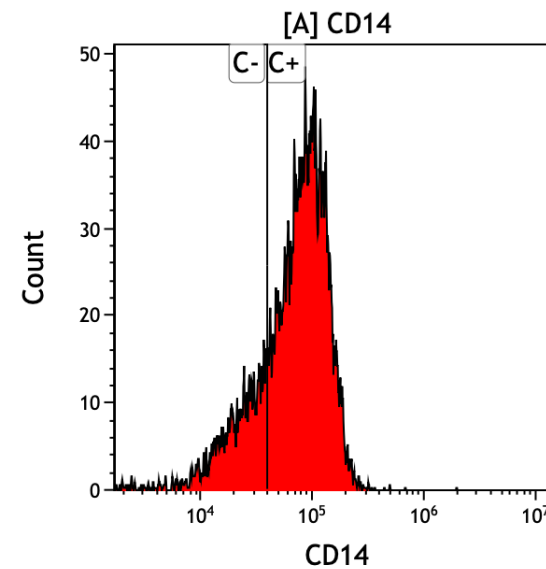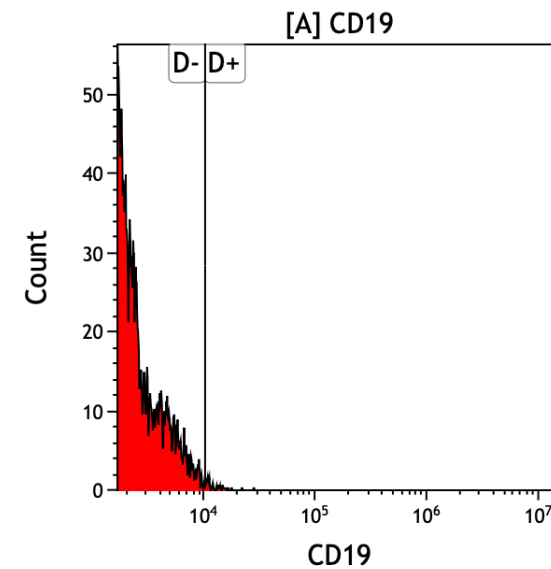

| Gate | %Gated |
|------|--------|
| All  | 100,00 |
| C-   | 24,73  |
| C+   | 75,27  |

| Gate | %Gated |
|------|--------|
| All  | 100,00 |
| D-   | 99,50  |
| D+   | 0,50   |

Flow cytometry – CLL-B-cells + PKH67  
stained-EVs

# M2-THP1 EVs

## 30min

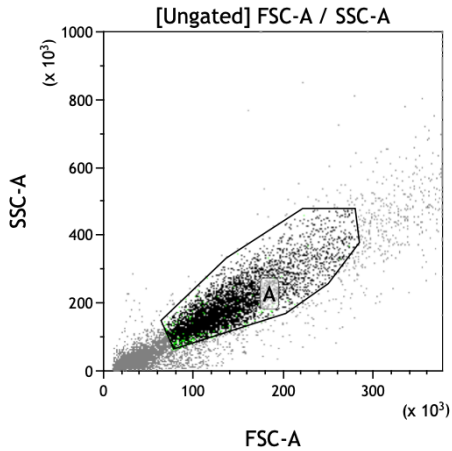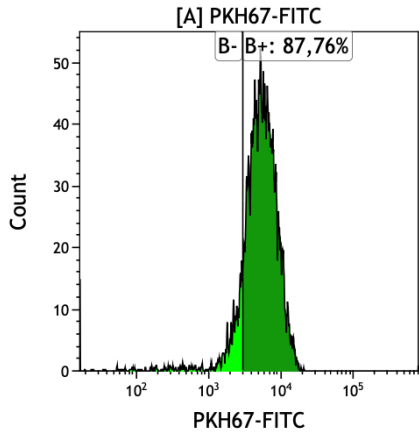

## 12h

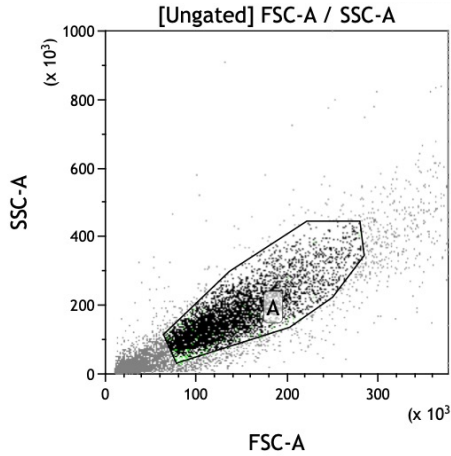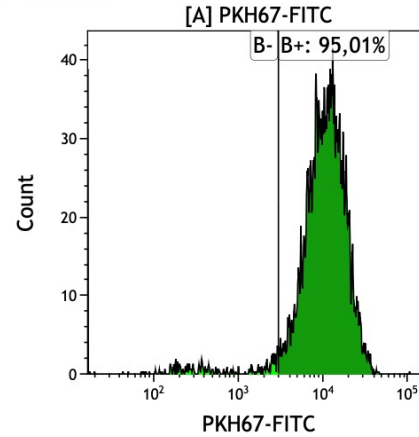

## 2h

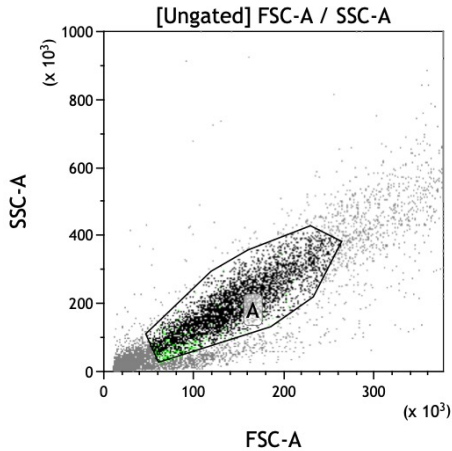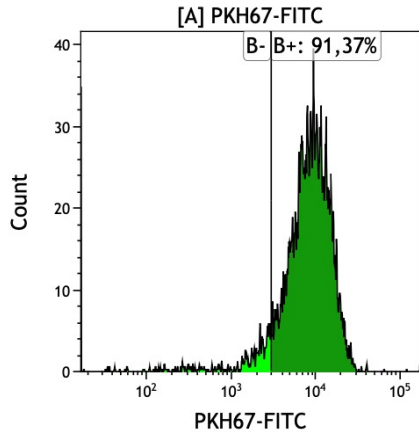

## 24h

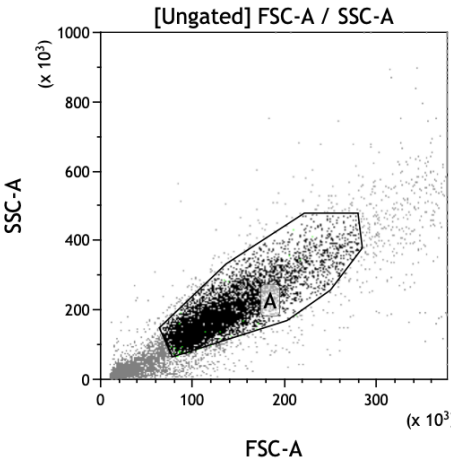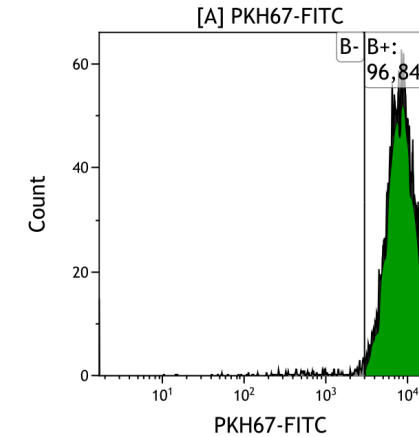

## CONTROL

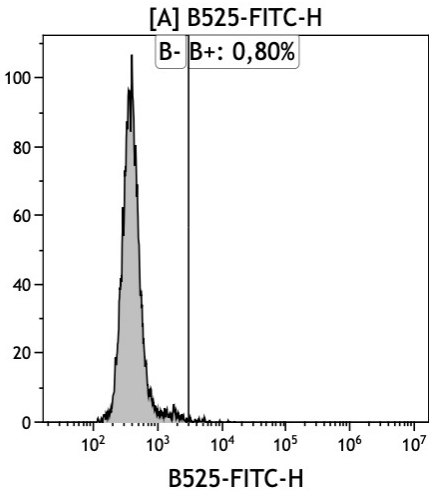

# NLCs EVs

## 30min

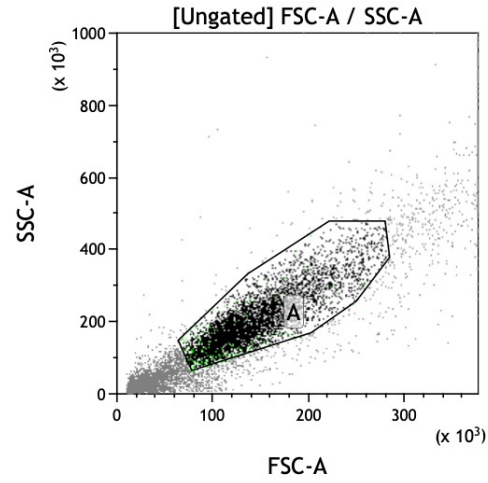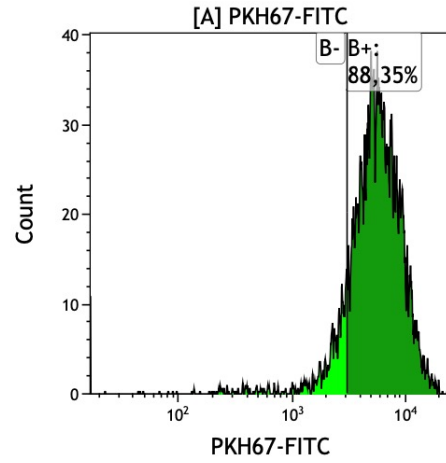

## 12h

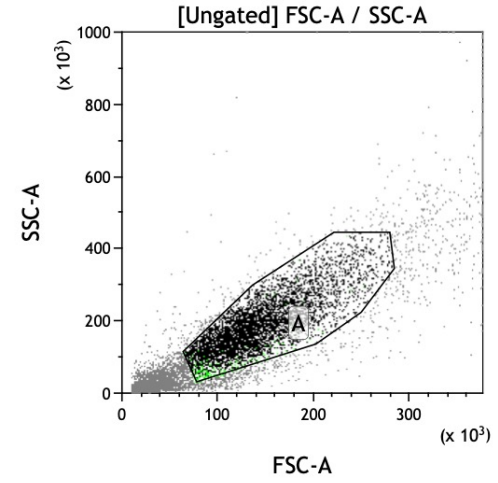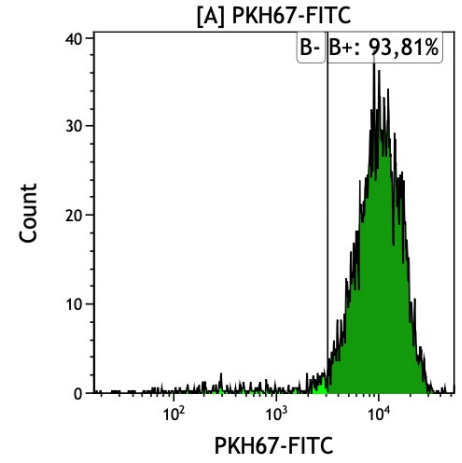

## 2h

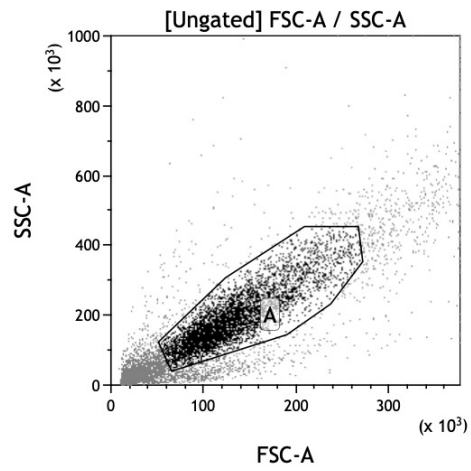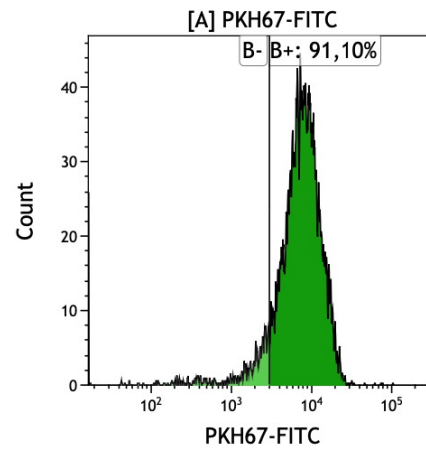

## 24h

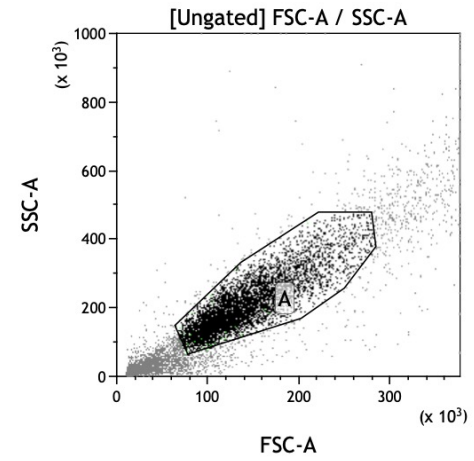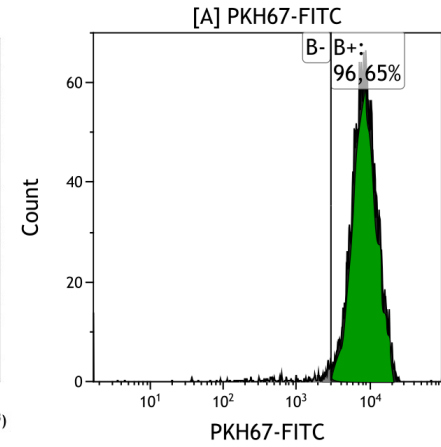

## CONTROL

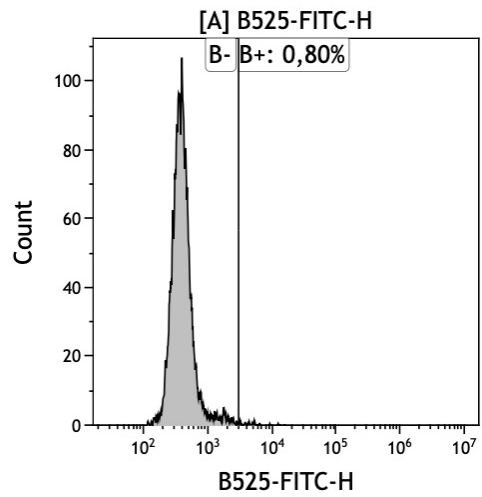



Figure 1:

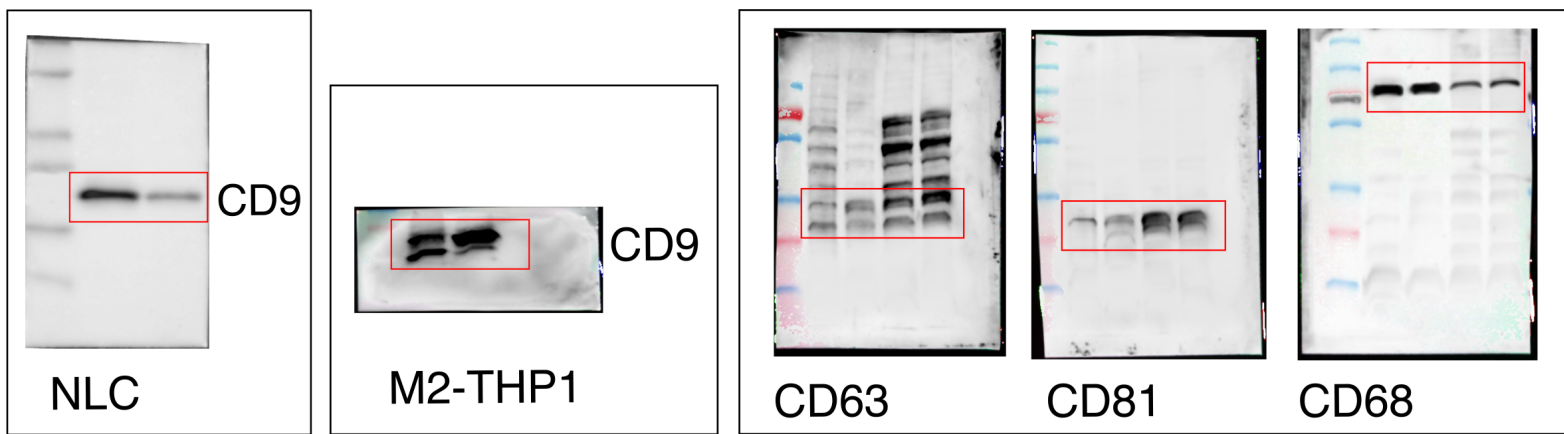

Figure 3:

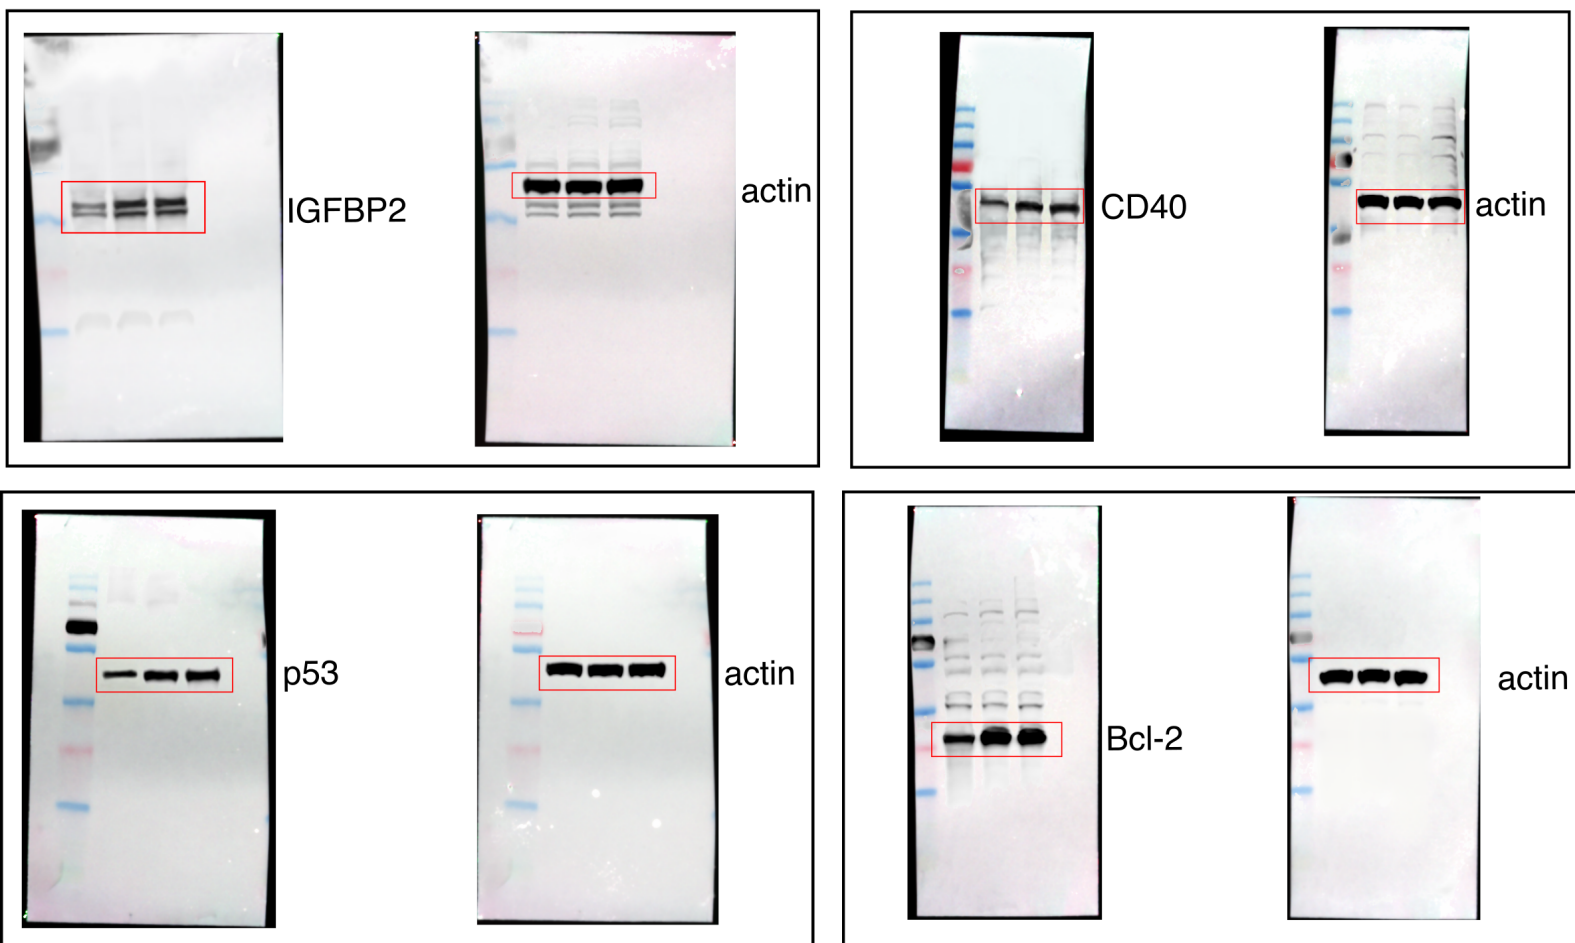

Supplementary Figure 3:

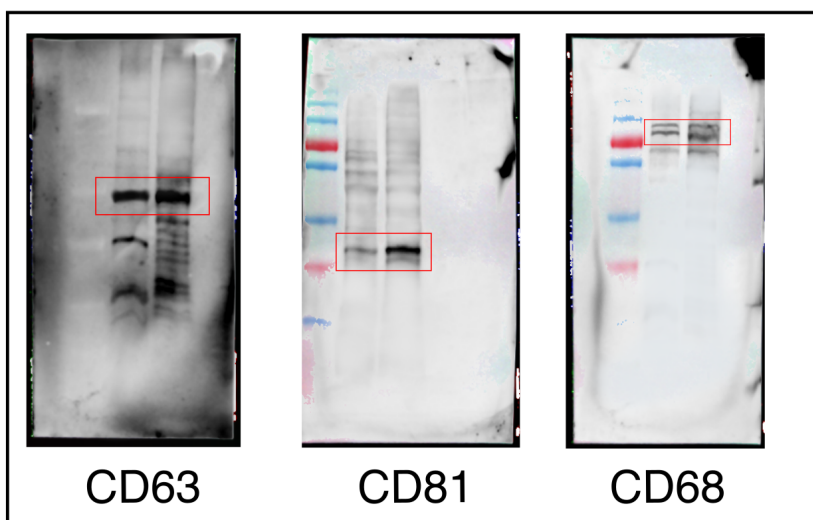

Supplement: 41417_2024_802_MOESM4_ESM.pdf [file 41417_2024_802_MOESM4_ESM.pdf]
