# Supplementary material for: Extracellular vesicles from type-2 macrophages increase the survival of chronic lymphocytic leukemia cells ex vivo
Source: PubMed Central journal article supplement (PMC11327105; doi:10.1038/s41417-024-00802-7), 2024-06-25
Supplement: 41417_2024_802_MOESM1_ESM.pdf [file 41417_2024_802_MOESM1_ESM.pdf]

## Supplementary data

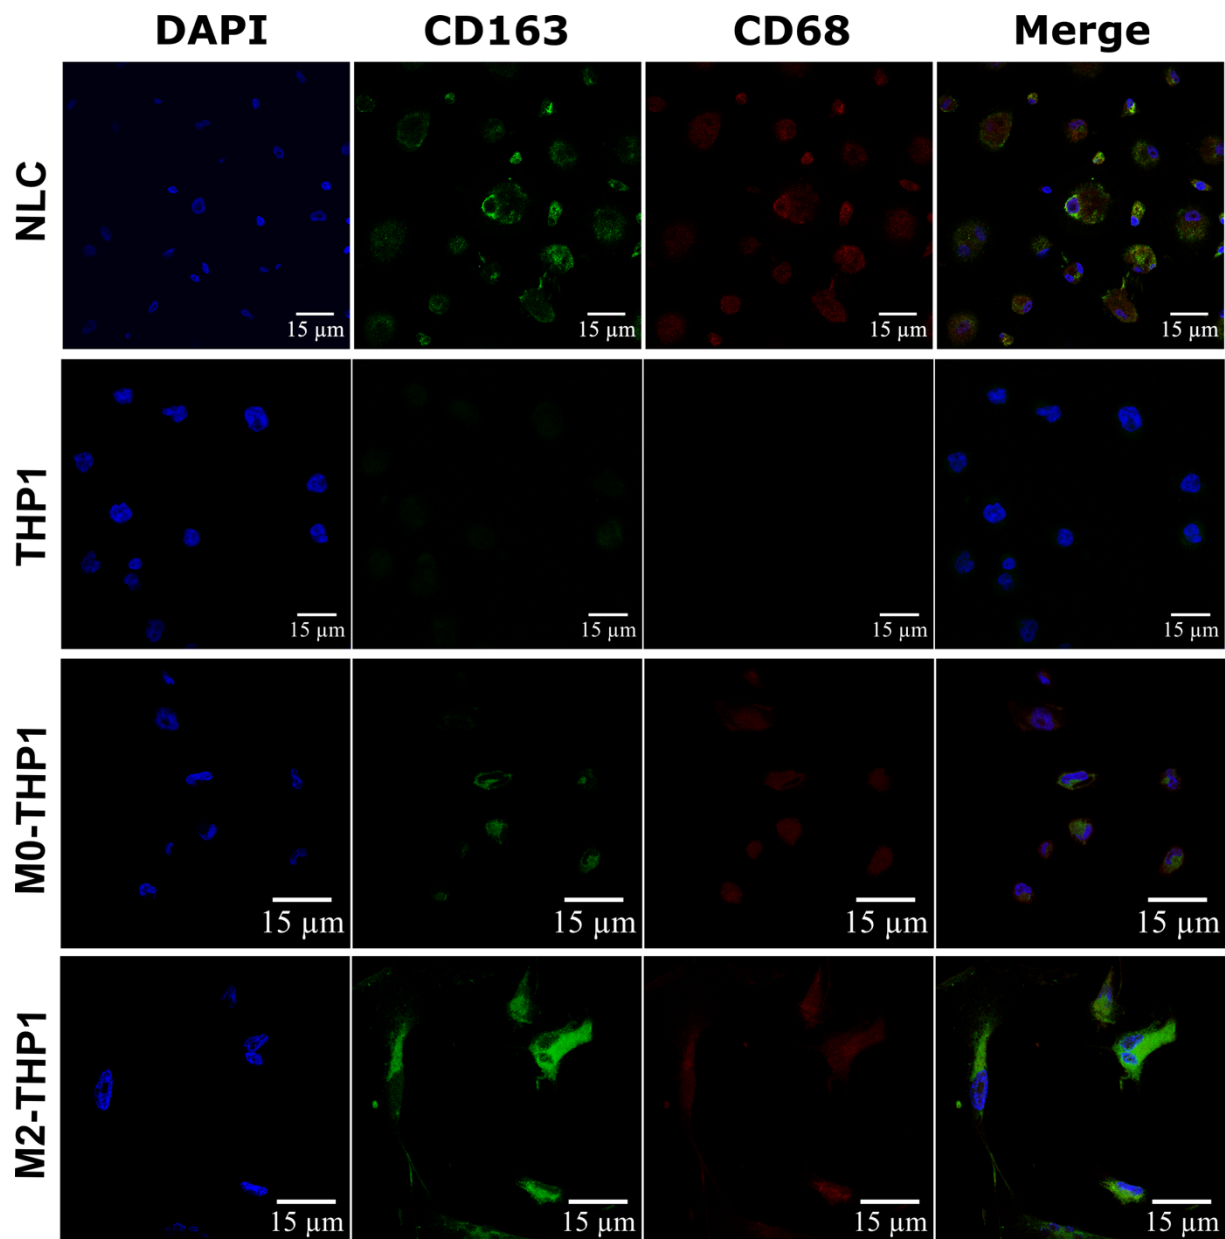

**Supplementary Figure 1: Control of M2-subtype macrophages markers expression in patient-derived NLCs and polarized THP1 cells.** Cells were seeded on coverslips within 12-well plates. Cells on the coverslips were then washed, fixed and blocked before being incubated with fluorochrome-coupled primary antibodies (anti-CD68 Alexa Fluor 647 #51-0689-42, Invitrogen & anti-CD163 Alexa Fluor 488 #568188, BD Biosciences) at a dilution of 1/100 for 1h at 4°C in the dark. They were then washed and mounted on slides using DAPI containing mounting medium. Slides were observed using LSM880 confocal microscope (Zeiss) at x40 magnification and data analyzed using Zeiss ZEN software and ImageJ.

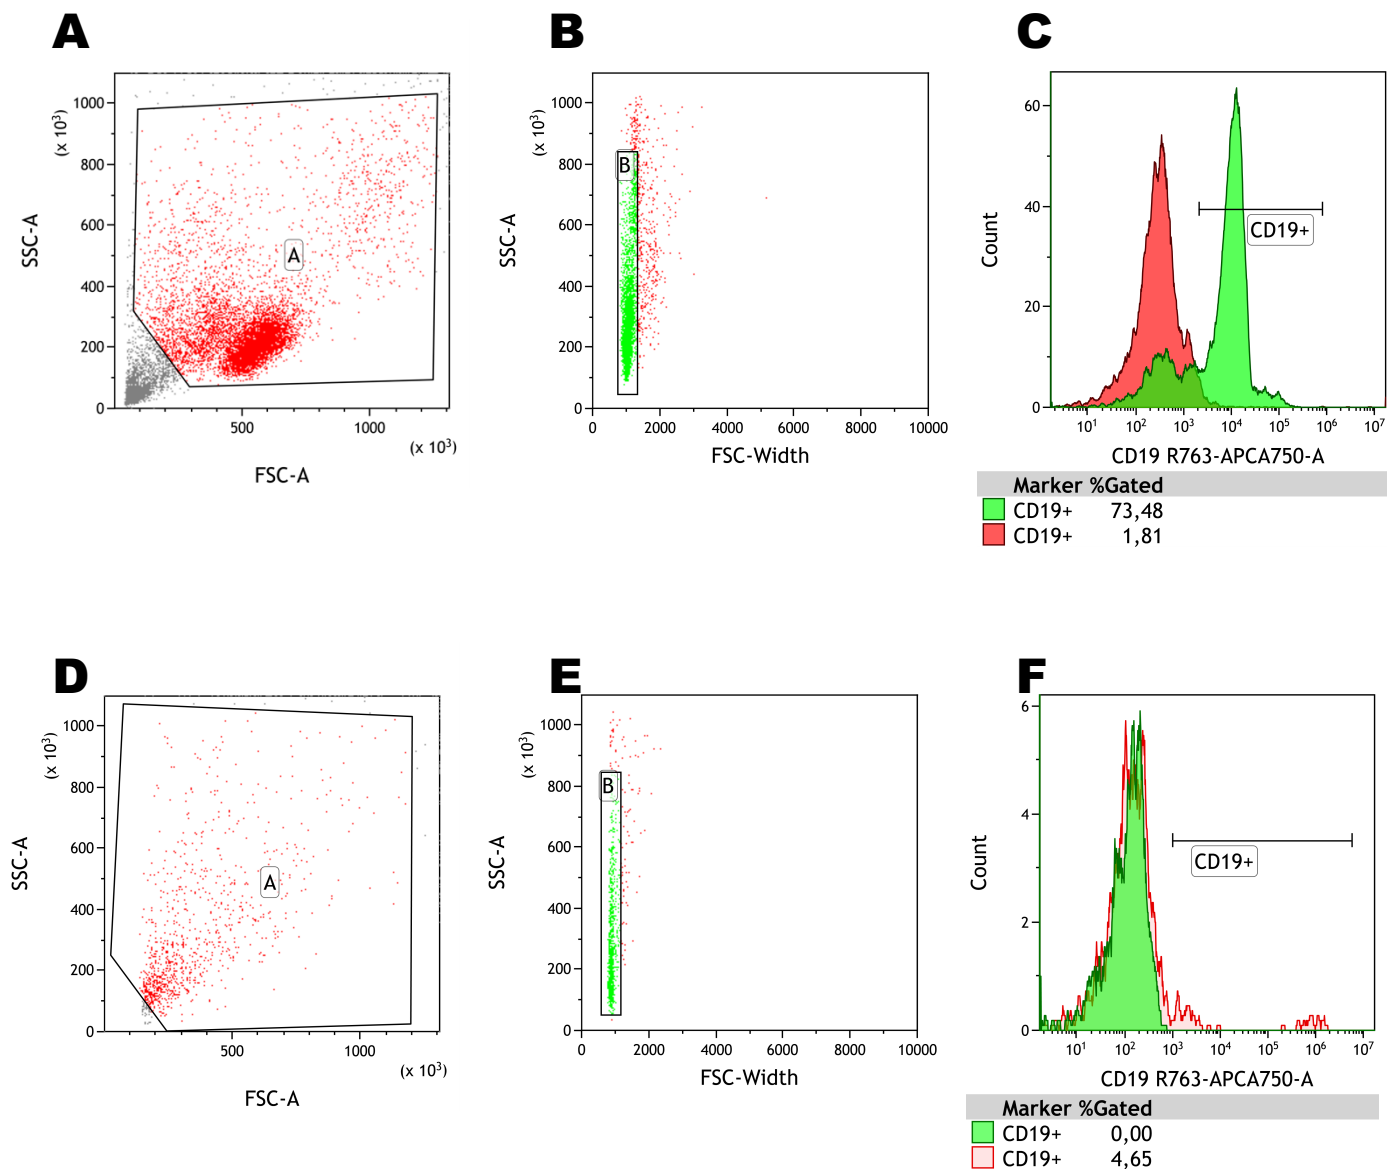

**Supplementary Figure 2: Measurement of CD19-positive cells after NLC differentiation**

**protocol.** PBMCs isolated from CLL patients ( $5 \times 10^6$  cells) were incubated for two weeks in 5 mL of RPMI medium in a 6-well plate. PBMCs were collected and labeled with anti-CD19 antibodies, then analyzed by FACS. Figure (A) represents unsorted PBMCs analyzed based on FSC and SSC. Cells selected within gate A were further analyzed for FSC-W and SSC to exclude cell aggregates (B). In Figure (C), the gated cells from B were analyzed for CD19 labeling. Before washing, approximately 73% of cells in the culture supernatant were CD19+ cells (B cells). The red curve represents isotypic labeling. Figures (D), (E), and (F) correspond to the analysis of NLC after B-cells removal by vigorous washing. After two weeks of PBMC incubation, cells in the supernatant were removed, and adherent NLCs were thoroughly washed three times with culture medium. After washing, NLCs were recovered *via* trypsin/EDTA treatment, and cells were labeled with an anti-CD19 antibody before FACS analysis. Figure (D) illustrates FSC/SSC analysis of unlabeled cells (predominantly NLC). Cells selected within

gate A were then analyzed based on FSC-W/SSC to exclude aggregates, and the selected cells within gate B were analyzed for CD19 labeling. As observed, no CD19-positive cells were detected. The red curve corresponds to isotypic labeling.

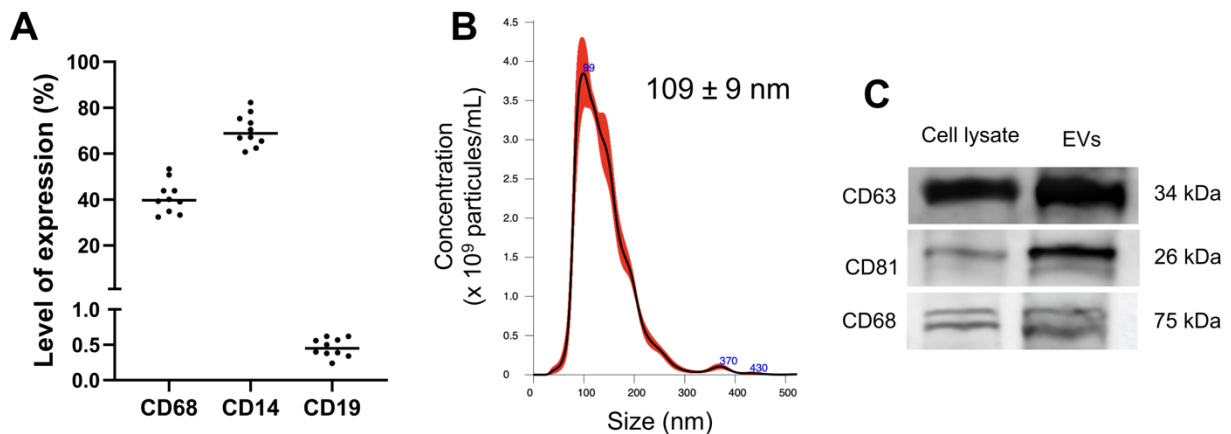

**Supplementary Figure 3: Characterization of healthy donors' monocytes/macrophages and their EVs.** (A) Monocytes isolated from healthy donors' blood were harvested and stained with anti-CD68 and anti-CD14 fluorochrome-coupled antibodies to check for macrophage/monocyte markers, as well as anti-CD19 fluorochrome-coupled antibody to check for any possible B cell contamination. They were then fixed and analyzed by flow cytometry. The presented graph represents the observed levels of expression, the line represents the mean. (B) Evaluation of particle size by Nanoparticle Tracking Analysis (NTA) using the NanoSight NS3000 (Malvern Panalytical) of EVs from healthy monocytes/macrophages. The numerical value is the mode (nm) +/- standard error. (C) Western blot analysis of EVs markers CD63 and CD81 and macrophage marker CD68.

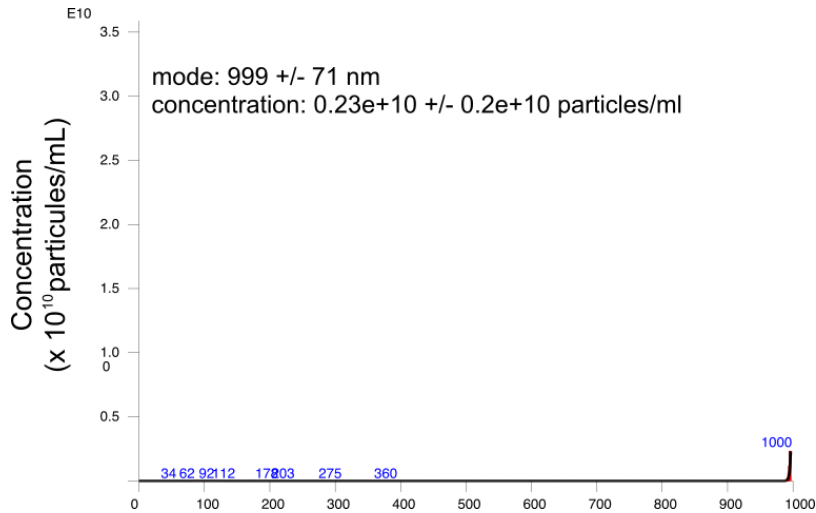

**Supplementary Figure 4: Evaluation of the presence of EVs in the ‘exo-free’ medium.** Evaluation of particle size and concentration in the ‘exo-free’ medium by Nanoparticle Tracking Analysis (NTA) using the NanoSight NS3000 (Malvern Panalytical). Mode (nm) and concentration are written +/- standard error.

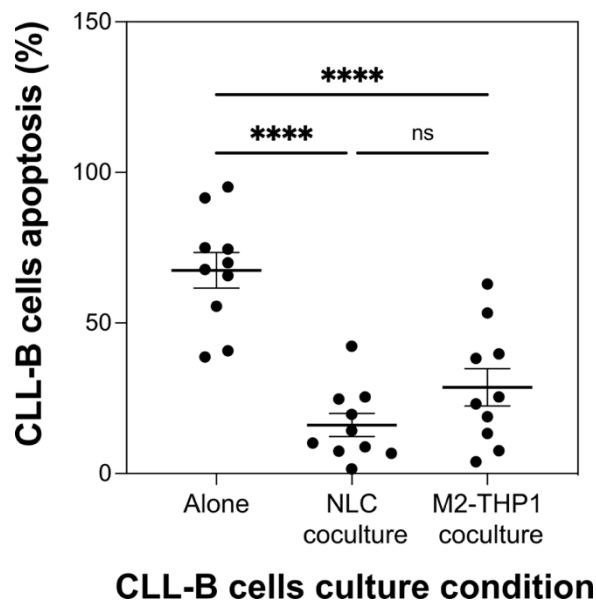

**Supplementary Figure 5: M2-THP1 cells and NLCs protect CLL patients B cells from apoptosis in co-culture.** Annexin V / IP labelling was used. 500 000 CLL-B-cells (before or after treatment) were resuspended in 100  $\mu$ L of PBS/ $\text{Ca}^{2+}$  and incubated with 5  $\mu$ L of Annexin V-FITC (90  $\mu$ g/ml) in the dark on ice for 15 minutes. Then, 400  $\mu$ L of PBS/ $\text{Ca}^{2+}$  and 5  $\mu$ L of IP (0.5 mg/ml) were added just before acquisition on the FACSCalibur flow cytometer (BD Biosciences).

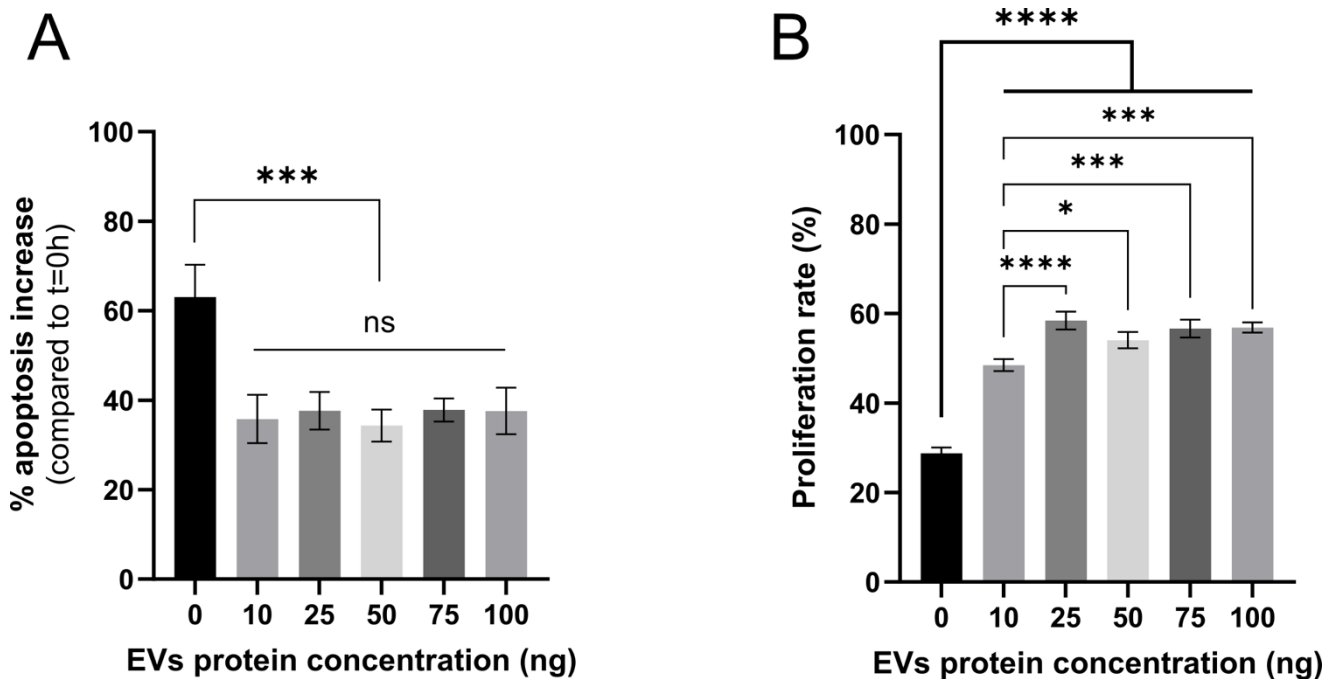

**Supplementary Figure 6: Test of an EVs protein concentration range.** 25 000 CLL-B cells (patient #1) were seeded in a 96-well plate and treated with a range of M2-THP1 EVs protein concentrations to determine an optimal dose. 25 ng was selected for all the following experiments ( $1.10^{-3}$  ng of EVs/cell). Experiments were conducted using the Incucyte live-cell imaging device, cells were marked with Annexin V (Sartorius) and fluorescence was monitored for 48h. The percentage of cells in apoptosis and the cell count were determined using the Incucyte base analysis software. Results are presented as mean  $\pm$  SEM. **(A)** The percentage of apoptosis at t=0h was subtracted to the percentage of apoptosis at 48h for each treatment condition. The graph plots the result of this subtraction which reflects the increase of CLL-B-cells apoptosis over a period of 48h. **(B)** The proliferation rate (increase rate of the cell count) was determined over a period of 48h.

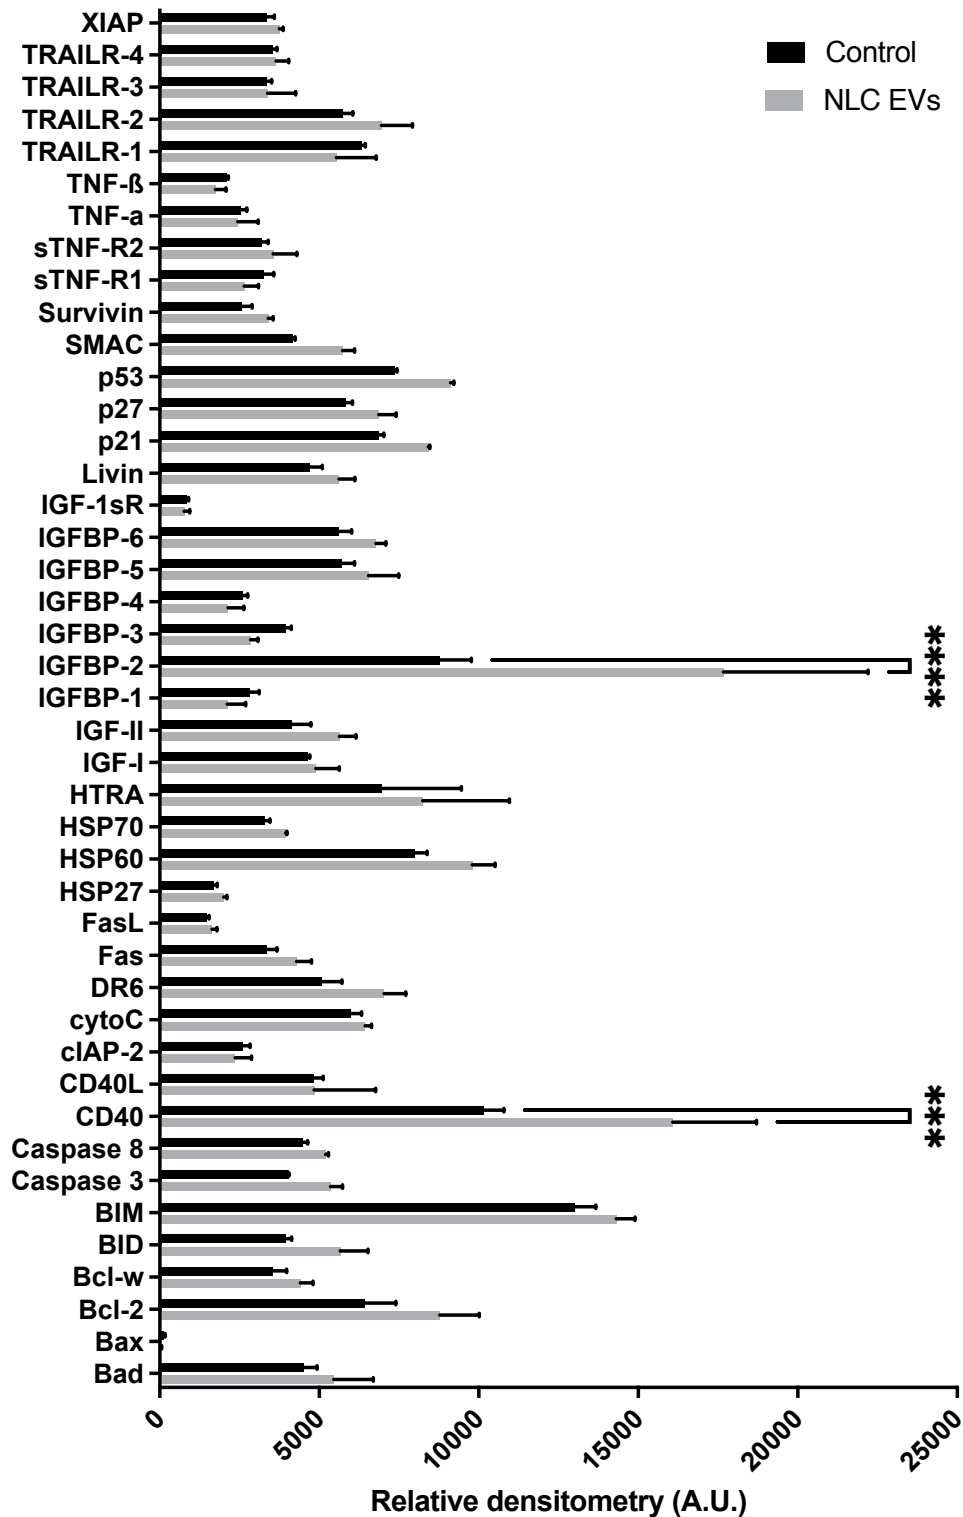

**Supplementary Figure 7: Proteome profiler array.** CLL-B cells from 2 patients (#4 and 10) were treated with EVs from NLCs and their protein extracts were incubated with an antibody array membrane (Abcam) to explore apoptosis-related pathways. Results are presented as mean  $\pm$  SD.

**Supplementary Table 1:** Characteristics of the patients included in the study.

| Patient ID number | Binet stage | cytogenetics                  | TP53                                | IGHV mutation      | Total prognosis (cytogenetics and/or mutations) |
|-------------------|-------------|-------------------------------|-------------------------------------|--------------------|-------------------------------------------------|
| 1                 | C           | Favorable del13q              | unmutated                           | mutated, favorable | not adverse                                     |
| 2                 | B           | Adverse del13q del17p         | mutated and deleted (R181C ; R342*) | unmutated, adverse | adverse                                         |
| 3                 | A           | ND                            | ND                                  | ND                 | ND                                              |
| 4                 | B           | Adverse del11q del6q          | unmutated                           | unmutated, adverse | adverse                                         |
| 5                 | A           | ND                            | ND                                  | ND                 | ND                                              |
| 6                 | C           | Adverse +12, del14q           | mutated (R273C ; G244D)             | unmutated, adverse | adverse                                         |
| 7                 | C           | adverse del17p (TP53) del13q  | mutated and deleted (C135Y)         | mutated, favorable | adverse                                         |
| 8                 | C           | Favorable del13q              | unmutated                           | unmutated, adverse | adverse                                         |
| 9                 | C           | Intermediate +12              | mutated                             | unmutated, adverse | adverse                                         |
| 10                | A           | Favorable del13q              | ND                                  | mutated, favorable | not adverse                                     |
| 11                | C           | Adverse del6q, del13q, del17p | mutated                             | unmutated, adverse | adverse                                         |
| 12                | B           | Adverse Complex >3            | mutated                             | unmutated, adverse | adverse                                         |
| 13                | C           | Adverse Complex >5            | ND                                  | unmutated, adverse | ND                                              |
| 14                | C           | Intermediate del14q           | unmutated                           | unmutated, adverse | intermediate                                    |
| 15                | C           | Adverse Complex >5            | unmutated                           | unmutated, adverse | adverse                                         |
| 16                | C           | Favorable del13q              | unmutated                           | mutated, subset 2  | intermediate                                    |

**Supplementary Table 2:** List of antibodies used

| Target | Host species | Reference | Manufacturer   | Application |
|--------|--------------|-----------|----------------|-------------|
| CD9    | rabbit       | 13403S    | Cell signaling | WB          |
| CD63   | mouse        | cb150053  | Merck          | WB          |
| CD81   | mouse        | sc-166029 | Santa cruz     | WB          |
| CD68   | mouse        | sc-20060  | Santa cruz     | WB          |
| IGFBP2 | mouse        | 16848715  | Proteintech    | WB          |
| CD40   | mouse        | 16889295  | Proteintech    | WB          |
| p53    | rabbit       | 16871435  | Proteintech    | WB          |

|                                      |                |          |                 |                |
|--------------------------------------|----------------|----------|-----------------|----------------|
| Bcl-2                                | rabbit         | 16810694 | Proteintech     | WB             |
| CD19 APC-H7                          | IgG1,κ mouse   | 560727   | BDbioscience    | Flow cytometry |
| CD14-ECD                             | IgG2a mouse    | B92391   | Beckman Coulter | Flow cytometry |
| CD68-FITC                            | IgG2b, κ mouse | 562117   | BDbioscience    | Flow cytometry |
| APC-H7 Mouse IgG1, κ Isotype Control | IgG1,κ mouse   | 561427   | Beckman Coulter | Flow cytometry |
| IgG2a Mouse-ECD, Isotype control     | IgG2a mouse    | A09144   | BDbioscience    | Flow cytometry |
| FITC Mouse IgG2b, κ Isotype Control  | IgG2b, κ mouse | 555057   | BDbioscience    | Flow cytometry |
